# Supplementary material
Source: MDPI journal article supplement (https://www.mdpi.com/2073-4441/11/9/1757)
Supplement: s1 [file s1]

## Sheet: Water parameters
Stream	Stream code	Sampling date	Month	Precipitation (mm/day)	Px100	Repetition	Temperature (ºC)	pH	ORP (mV)	Ec (mS/cm)	Turbidity (NTU)	Dissolved Oxygen - DO (mg/L)	DO (%)	TDS (mg/L)
LANHOSO	CLn	2016-01-19	Jan-2016	2	200	1	23.5	7.39	163	0.09	5	9.52	114.5	0.059
LANHOSO	CLn	2016-01-19		2.1	210	2	23.47	7.37	160	0.09	4.8	9.26	111.3	0.059
LANHOSO	CLn	2016-01-19		2.2	220	3	23.47	7.37	157	0.09	5.2	9.04	108.7	0.058
LANHOSO	CLn	2016-01-19		2.3	230	4	23.47	7.35	157	0.09	5	8.85	106.4	0.058
LANHOSO	CLn	2016-01-19		2.4	240	5	23.47	7.36	156	0.09	5.3	8.76	105.3	0.058
LANHOSO	CLn	2016-01-19		2.5	250	6	23.46	7.37	155	0.09	5.3	8.65	104	0.058
LANHOSO	CLn	2016-01-19		2.6	260	7	23.45	7.34	155	0.09	5.4	8.61	103.4	0.058
LANHOSO	CLn	2016-01-19		2.7	270	8	23.44	7.34	153	0.089	5.4	8.53	102.5	0.058
LANHOSO	CLn	2016-01-19		2.8	280	9	23.44	7.33	153	0.089	5.1	8.43	101.3	0.058
LANHOSO	CLn	2016-01-19		2.9	290	10	23.44	7.31	155	0.089	4.9	8.25	99.2	0.058
LANHOSO	CLn	2016-02-16	Fev-2016	5.9	590	1	23.54	7.25	343	0.125	4.2	8.21	98.7	0.081
LANHOSO	CLn	2016-02-16		5.1	510	2	23.5	7.24	337	0.122	4.1	8.15	98	0.079
LANHOSO	CLn	2016-02-16		5.11	511	3	23.49	7.24	332	0.12	4.4	8.02	96.4	0.078
LANHOSO	CLn	2016-02-16		5.12	512	4	23.46	7.2	329	0.119	4.4	7.85	94.3	0.077
LANHOSO	CLn	2016-02-16		5.13	513	5	23.42	7.21	324	0.118	4.1	7.77	93.3	0.077
LANHOSO	CLn	2016-02-16		5.14	514	6	23.43	7.19	321	0.117	3.9	7.67	92.2	0.076
LANHOSO	CLn	2016-02-16		5.15	515	7	23.44	7.09	323	0.117	3.9	7.54	90.6	0.076
LANHOSO	CLn	2016-02-16		5.16	516	8	23.41	7.06	320	0.115	4.3	7.41	89	0.075
LANHOSO	CLn	2016-02-16		5.17	517	9	23.41	7.06	317	0.114	4.3	7.3	87.7	0.074
LANHOSO	CLn	2016-02-16		5.18	518	10	23.41	7.01	316	0.113	4.1	7.25	87	0.074
LANHOSO	CLn	2016-03-15	Mar-2016	4	400	1	23.02	7.04	195	0.12	4	6.32	75.4	0.078
LANHOSO	CLn	2016-03-15		4.1	410	2	23.02	7.01	196	0.12	4	6.27	74.8	0.078
LANHOSO	CLn	2016-03-15		4.2	420	3	23.02	6.96	197	0.12	3.9	6.24	74.5	0.078
LANHOSO	CLn	2016-03-15		4.3	430	4	23.02	6.94	198	0.12	4	6.11	72.9	0.078
LANHOSO	CLn	2016-03-15		4.4	440	5	23.02	6.89	200	0.12	4.3	6.08	72.5	0.078
LANHOSO	CLn	2016-03-15		4.5	450	6	23.02	6.84	201	0.12	3.9	6.09	72.7	0.078
LANHOSO	CLn	2016-03-15		4.6	460	7	23.03	6.81	202	0.12	4.1	6.11	72.9	0.078
LANHOSO	CLn	2016-03-15		4.7	470	8	23.03	6.77	204	0.12	3.9	6.14	73.3	0.078
LANHOSO	CLn	2016-03-15		4.8	480	9	23.02	6.74	205	0.12	3.9	6.12	73	0.078
LANHOSO	CLn	2016-03-15		4.9	490	10	23.02	6.7	206	0.12	3.9	6.07	72.4	0.078
LANHOSO	CLn	2016-04-19	Apr-2016	2.4	240	1	22.93	6.91	254	0.072	5.8		500	0.047
LANHOSO	CLn	2016-04-19		2.5	250	2	22.93	6.9	255	0.072	5.2		500	0.047
LANHOSO	CLn	2016-04-19		2.6	260	3	22.92	6.82	260	0.072	4.3		500	0.047
LANHOSO	CLn	2016-04-19		2.7	270	4	22.9	6.83	259	0.072	3.7		500	0.047
LANHOSO	CLn	2016-04-19		2.8	280	5	22.87	6.87	258	0.072	3.4		500	0.047
LANHOSO	CLn	2016-04-19		2.9	290	6	22.81	6.86	259	0.073	3.5		500	0.047
LANHOSO	CLn	2016-04-19		2.1	210	7	22.71	6.87	259	0.073	3.6		500	0.047
LANHOSO	CLn	2016-04-19		2.11	211	8	22.71	6.88	259	0.073	4.1		500	0.047
LANHOSO	CLn	2016-04-19		2.12	212	9	22.72	6.88	259	0.073	4.2		500	0.047
LANHOSO	CLn	2016-04-19		2.13	213	10	22.74	6.87	261	0.073	4.4		500	0.047
LANHOSO	CLn	2016-05-17	May-2016	0.5	50	1	18.31	7.6	225	0.103	0.6	14.58	159.7	0.067
LANHOSO	CLn	2016-05-17		0.6	60	2	18.3	7.67	220	0.102	0.8	12.99	142.3	0.067
LANHOSO	CLn	2016-05-17		0.7	70	3	18.29	7.72	215	0.1	0.7	12.06	132	0.065
LANHOSO	CLn	2016-05-17		0.8	80	4	18.29	7.74	212	0.1	0.9	11.42	125	0.065
LANHOSO	CLn	2016-05-17		0.9	90	5	18.29	7.76	209	0.101	0.7	10.96	120	0.065
LANHOSO	CLn	2016-05-17		0.1	10	6	18.29	7.77	206	0.1	0.7	10.63	116.4	0.065
LANHOSO	CLn	2016-05-17		0.11	11	7	18.28	7.78	204	0.099	1.4	10.39	113.7	0.064
LANHOSO	CLn	2016-05-17		0.12	12	8	18.28	7.78	201	0.098	0.9	10.19	111.5	0.063
LANHOSO	CLn	2016-05-17		0.13	13	9	18.29	7.79	199	0.098	0.7	10.03	109.8	0.063
LANHOSO	CLn	2016-05-17		0.14	14	10	18.29	7.79	197	0.099	0.7	9.85	107.9	0.064
LANHOSO	CLn	2016-06-21	Jun-2016	0.2	20	1	16.85	6.9	225	0.079	12.8	7.17	76.3	0.051
LANHOSO	CLn	2016-06-21		0.3	30	2	16.81	6.88	224	0.096	2.4	7.3	77.6	0.063
LANHOSO	CLn	2016-06-21		0.4	40	3	16.8	6.97	216	0.1	2.5	7.15	76	0.065
LANHOSO	CLn	2016-06-21		0.5	50	4	16.78	7.04	212	0.101	2.3	7.06	75	0.066
LANHOSO	CLn	2016-06-21		0.6	60	5	16.77	7.09	209	0.101	2.3	7	74.3	0.066
LANHOSO	CLn	2016-06-21		0.7	70	6	16.77	7.07	209	0.101	1.8	6.93	73.7	0.066
LANHOSO	CLn	2016-06-21		0.8	80	7	16.77	7.06	209	0.101	1.9	6.92	73.5	0.066
LANHOSO	CLn	2016-06-21		0.9	90	8	16.78	7.02	210	0.101	2.4	6.97	74	0.066
LANHOSO	CLn	2016-06-21		0.1	10	9	16.78	6.91	215	0.101	1.9	7.03	74.7	0.066
LANHOSO	CLn	2016-06-21		0.11	11	10	16.78	6.9	215	0.101	1.8	7.05	75	0.066
LANHOSO	CLn	2016-07-19	Jul-2016	0	0	1	16.86	6.81	199	0.081	1.5	9.63	102.6	0.053
LANHOSO	CLn	2016-07-19		0.1	10	2	16.85	6.85	204	0.053	1.5	9.23	98.2	0.035
LANHOSO	CLn	2016-07-19		0.2	20	3	16.84	6.91	205	0.045	1.4	8.9	94.6	0.029
LANHOSO	CLn	2016-07-19		0.3	30	4	16.84	6.93	207	0.046	1.8	8.66	92.1	0.03
LANHOSO	CLn	2016-07-19		0.4	40	5	16.83	6.96	196	0.029	1.7	8.44	89.8	0.019
LANHOSO	CLn	2016-07-19		0.5	50	6	16.83	7.02	183	0.021	1.5	8.32	88.4	0.014
LANHOSO	CLn	2016-07-19		0.6	60	7	16.82	7.03	187	0.025	1.6	8.21	87.3	0.016
LANHOSO	CLn	2016-07-19		0.7	70	8	16.82	7	181	0.024	1.7	8.15	86.7	0.016
LANHOSO	CLn	2016-07-19		0.8	80	9	16.82	7.03	173	0.008	1.8	8.09	86	0.005
LANHOSO	CLn	2016-07-19		0.9	90	10	16.82	7.12	171	0.087	2.8	8.13	86.4	0.054
LANHOSO	CLn	2016-08-16	Ago-2016	0.8	80	1	15.98	7.77	214	0.111	0	8.6	89.9	0.072
LANHOSO	CLn	2016-08-16		0.9	90	2	15.95	7.78	212	0.111	0	8.58	89.7	0.072
LANHOSO	CLn	2016-08-16		0.1	10	3	15.91	7.78	211	0.111	0	8.56	89.4	0.072
LANHOSO	CLn	2016-08-16		0.11	11	4	15.88	7.77	210	0.111	0	8.54	89.1	0.072
LANHOSO	CLn	2016-08-16		0.12	12	5	15.87	7.76	210	0.111	0	8.52	88.8	0.072
LANHOSO	CLn	2016-08-16		0.13	13	6	15.87	7.76	209	0.111	0	8.48	88.5	0.072
LANHOSO	CLn	2016-08-16		0.14	14	7	15.87	7.75	208	0.111	0	8.44	88.1	0.072
LANHOSO	CLn	2016-08-16		0.15	15	8	15.85	7.75	207	0.111	0	8.42	87.8	0.072
LANHOSO	CLn	2016-08-16		0.16	16	9	15.83	7.74	206	0.111	0	8.4	87.5	0.072
LANHOSO	CLn	2016-08-16		0.17	17	10	15.82	7.73	205	0.111	0	8.38	87.3	0.072
LANHOSO	CLn	2016-09-20	Set-2016	0.1	10	1	18.07	7.89	116	0.039	1.5	6.29	68.5	0.026
LANHOSO	CLn	2016-09-20		0.2	20	2	18.06	7.89	116	0.039	1.5	6.13	66.8	0.026
LANHOSO	CLn	2016-09-20		0.3	30	3	18.06	7.88	117	0.039	1.5	6.36	69.3	0.026
LANHOSO	CLn	2016-09-20		0.4	40	4	18.05	7.88	116	0.039	1.5	6.52	71	0.026
LANHOSO	CLn	2016-09-20		0.5	50	5	18.05	7.88	116	0.039	1.6	6.31	68.7	0.025
LANHOSO	CLn	2016-09-20		0.6	60	6	18.05	7.88	116	0.039	1.5	6.36	69.3	0.025
LANHOSO	CLn	2016-09-20		0.7	70	7	18.05	7.87	116	0.039	1.5	6.48	70.6	0.026
LANHOSO	CLn	2016-09-20		0.8	80	8	19.61	7.16	250	0.069	2	5.44	61.1	0.045
LANHOSO	CLn	2016-09-20		0.9	90	9	19.59	7.13	250	0.069	2.4	5.39	60.4	0.045
LANHOSO	CLn	2016-09-20		0.1	10	10	19.56	7.11	250	0.069	2.7	5.32	59.7	0.045
LANHOSO	CLn	2016-10-18	Out-2016	3.7	370	1	19.46	7.46	181	0.119	0.5	12.93	144.7	0.077
LANHOSO	CLn	2016-10-18		3.8	380	2	19.44	7.54	178	0.119	0.6	12.41	138.8	0.078
LANHOSO	CLn	2016-10-18		3.9	390	3	19.43	7.59	176	0.119	0.5	12.01	134.4	0.078
LANHOSO	CLn	2016-10-18		3.1	310	4	19.42	7.64	174	0.119	0.4	11.71	131	0.078
LANHOSO	CLn	2016-10-18		3.11	311	5	19.38	7.68	172	0.119	0.7	11.49	128.5	0.078
LANHOSO	CLn	2016-10-18		3.12	312	6	19.35	7.71	170	0.119	0.5	11.31	126.4	0.078
LANHOSO	CLn	2016-10-18		3.13	313	7	19.34	7.73	168	0.12	0.5	11.17	124.8	0.078
LANHOSO	CLn	2016-10-18		3.14	314	8	19.35	7.75	166	0.119	0.4	11.04	123.4	0.078
LANHOSO	CLn	2016-10-18		3.15	315	9	19.33	7.76	164	0.119	0.5	10.95	122.3	0.078
LANHOSO	CLn	2016-10-18		3.16	316	10	19.32	7.75	163	0.12	0.6	10.86	121.3	0.078
LANHOSO	CLn	2016-11-15	Nov-2016	1.9	190	1	19.06	7.86	194	0.05	0.2	6.4	71.1	0.032
LANHOSO	CLn	2016-11-15		1.1	110	2	19.07	7.83	195	0.05	0.2	6.24	69.4	0.032
LANHOSO	CLn	2016-11-15		1.11	111	3	19.03	7.81	196	0.05	0.2	6.13	68	0.032
LANHOSO	CLn	2016-11-15		1.12	112	4	18.94	7.77	196	0.049	0.3	6.42	71.1	0.032
LANHOSO	CLn	2016-11-15		1.13	113	5	18.91	7.75	196	0.05	0.3	6.63	73.5	0.032
LANHOSO	CLn	2016-11-15		1.14	114	6	18.88	7.72	196	0.05	0.5	6.48	71.7	0.032
LANHOSO	CLn	2016-11-15		1.15	115	7	18.91	7.69	197	0.049	0.3	6.44	71.4	0.032
LANHOSO	CLn	2016-11-15		1.16	116	8	18.97	7.67	197	0.049	0.3	6.11	67.8	0.032
LANHOSO	CLn	2016-11-15		1.17	117	9	18.98	7.65	198	0.049	0.4	5.73	63.5	0.032
LANHOSO	CLn	2016-11-15		1.18	118	10	18.94	7.63	198	0.049	0.7	5.8	64.3	0.032
LANHOSO	CLn	2016-12-20	Dez-2016	2.3	230	1	18.97	8.16	203	0.111	0	7.41	82.2	0.072
LANHOSO	CLn	2016-12-20		2.4	240	2	18.97	8.15	203	0.111	0	7.32	81.2	0.072
LANHOSO	CLn	2016-12-20		2.5	250	3	18.95	8.14	202	0.111	0	7.22	80	0.072
LANHOSO	CLn	2016-12-20		2.6	260	4	18.92	8.13	202	0.111	0	7.07	78.4	0.072
LANHOSO	CLn	2016-12-20		2.7	270	5	18.91	8.12	202	0.111	0	6.9	76.5	0.072
LANHOSO	CLn	2016-12-20		2.8	280	6	18.87	8.11	201	0.111	0	6.85	75.8	0.072
LANHOSO	CLn	2016-12-20		2.9	290	7	18.86	8.1	201	0.111	0	6.83	75.6	0.072
LANHOSO	CLn	2016-12-20		2.1	210	8	18.85	8.09	201	0.111	0	6.84	75.7	0.072
LANHOSO	CLn	2016-12-20		2.11	211	9	18.85	8.08	201	0.111	0	6.71	74.3	0.072
LANHOSO	CLn	2016-12-20		2.12	212	10	18.86	8.08	200	0.111	0	6.54	72.4	0.072
LANHOSO	CLn	2017-01-17	Jan-2017	10.9	1090	1	19.46	7.46	181	0.119	0.5	12.93	144.7	0.077
LANHOSO	CLn	2017-01-17		10.1	1010	2	19.44	7.54	178	0.119	0.6	12.41	138.8	0.078
LANHOSO	CLn	2017-01-17		10.11	1011	3	19.43	7.59	176	0.119	0.5	12.01	134.4	0.078
LANHOSO	CLn	2017-01-17		10.12	1012	4	19.42	7.64	174	0.119	0.4	11.71	131	0.078
LANHOSO	CLn	2017-01-17		10.13	1013	5	19.38	7.68	172	0.119	0.7	11.49	128.5	0.078
LANHOSO	CLn	2017-01-17		10.14	1014	6	19.35	7.71	170	0.119	0.5	11.31	126.4	0.078
LANHOSO	CLn	2017-01-17		10.15	1015	7	19.34	7.73	168	0.12	0.5	11.17	124.8	0.078
LANHOSO	CLn	2017-01-17		10.16	1016	8	19.35	7.75	166	0.119	0.4	11.04	123.4	0.078
LANHOSO	CLn	2017-01-17		10.17	1017	9	19.33	7.76	164	0.119	0.5	10.95	122.3	0.078
LANHOSO	CLn	2017-01-17		10.18	1018	10	19.32	7.75	163	0.12	0.6	10.86	121.3	0.078
MANGABEIRA 1	CM1	2016-01-19		2	200	1	23.34	6.65	152	0.037	10.8	7.55	90.5	0.024
MANGABEIRA 1	CM1	2016-01-19		2.1	210	2	23.33	6.66	150	0.037	11	7.54	90.5	0.024
MANGABEIRA 1	CM1	2016-01-19		2.2	220	3	23.33	6.67	149	0.037	10.9	7.52	90.1	0.024
MANGABEIRA 1	CM1	2016-01-19		2.3	230	4	23.33	6.63	150	0.037	10.5	7.49	89.8	0.024
MANGABEIRA 1	CM1	2016-01-19		2.4	240	5	23.33	6.65	150	0.037	10.6	7.48	89.7	0.024
MANGABEIRA 1	CM1	2016-01-19		2.5	250	6	23.33	6.65	150	0.037	10.5	7.47	89.6	0.024
MANGABEIRA 1	CM1	2016-01-19		2.6	260	7	23.33	6.63	150	0.037	10.5	7.44	89.2	0.024
MANGABEIRA 1	CM1	2016-01-19		2.7	270	8	23.33	6.61	151	0.037	11.1	7.41	88.8	0.024
MANGABEIRA 1	CM1	2016-01-19		2.8	280	9	23.33	6.62	152	0.037	10.8	7.38	88.5	0.024
MANGABEIRA 1	CM1	2016-01-19		2.9	290	10	23.33	6.64	150	0.037	10.6	7.36	88.2	0.024
MANGABEIRA 1	CM1	2016-02-16		5.9	590	1	23.09	6.57	145	0.053	4.2	7.81	93.2	0.034
MANGABEIRA 1	CM1	2016-02-16		5.1	510	2	23.08	6.56	144	0.053	4.7	7.73	92.3	0.034
MANGABEIRA 1	CM1	2016-02-16		5.11	511	3	23.08	6.51	143	0.052	4.5	7.62	91	0.034
MANGABEIRA 1	CM1	2016-02-16		5.12	512	4	23.08	6.5	143	0.052	4	7.56	90.2	0.034
MANGABEIRA 1	CM1	2016-02-16		5.13	513	5	23.07	6.48	144	0.052	3.9	7.49	89.4	0.034
MANGABEIRA 1	CM1	2016-02-16		5.14	514	6	23.07	6.44	145	0.052	3.9	7.46	89.1	0.034
MANGABEIRA 1	CM1	2016-02-16		5.15	515	7	23.08	6.42	146	0.052	3.9	7.41	88.4	0.034
MANGABEIRA 1	CM1	2016-02-16		5.16	516	8	23.08	6.39	146	0.052	3.9	7.35	87.8	0.034
MANGABEIRA 1	CM1	2016-02-16		5.17	517	9	23.08	6.37	147	0.052	4	7.34	87.7	0.034
MANGABEIRA 1	CM1	2016-02-16		5.18	518	10	23.07	6.35	149	0.052	4	7.31	87.2	0.034
MANGABEIRA 1	CM1	2016-03-15		4	400	1	23.14	6.32	153	0.053	5.5	6.91	82.6	0.034
MANGABEIRA 1	CM1	2016-03-15		4.1	410	2	23.15	6.31	153	0.053	5.3	6.77	81	0.034
MANGABEIRA 1	CM1	2016-03-15		4.2	420	3	23.14	6.3	152	0.053	5.4	6.68	79.9	0.034
MANGABEIRA 1	CM1	2016-03-15		4.3	430	4	23.14	6.28	152	0.053	5.3	6.62	79.1	0.034
MANGABEIRA 1	CM1	2016-03-15		4.4	440	5	23.14	6.27	152	0.053	5.5	6.53	78.1	0.034
MANGABEIRA 1	CM1	2016-03-15		4.5	450	6	23.14	6.25	153	0.053	5.4	6.46	77.2	0.034
MANGABEIRA 1	CM1	2016-03-15		4.6	460	7	23.14	6.24	155	0.053	5.4	6.41	76.6	0.034
MANGABEIRA 1	CM1	2016-03-15		4.7	470	8	23.14	6.23	157	0.053	5.3	6.37	76.1	0.034
MANGABEIRA 1	CM1	2016-03-15		4.8	480	9	23.14	6.21	158	0.053	5.5	6.32	75.5	0.034
MANGABEIRA 1	CM1	2016-03-15		4.9	490	10	23.14	6.21	159	0.053	5.3	6.3	75.4	0.034
MANGABEIRA 1	CM1	2016-04-19		2.4	240	1	16.3	6.75	107	0.056	3	7.4	77.8	0.036
MANGABEIRA 1	CM1	2016-04-19		2.5	250	2	16.31	6.78	104	0.058	3.3	7.3	76.8	0.038
MANGABEIRA 1	CM1	2016-04-19		2.6	260	3	16.31	6.79	105	0.058	3.8	7.16	75.3	0.038
MANGABEIRA 1	CM1	2016-04-19		2.7	270	4	16.3	6.8	106	0.058	3.3	7	73.7	0.037
MANGABEIRA 1	CM1	2016-04-19		2.8	280	5	16.31	6.75	110	0.058	3.1	7.02	73.9	0.038
MANGABEIRA 1	CM1	2016-04-19		2.9	290	6	16.31	6.67	114	0.058	3	7.13	75.1	0.038
MANGABEIRA 1	CM1	2016-04-19		2.1	210	7	16.3	6.62	116	0.058	2.8	7.12	74.9	0.038
MANGABEIRA 1	CM1	2016-04-19		2.11	211	8	16.31	6.55	120	0.058	2.7	7.14	75.2	0.037
MANGABEIRA 1	CM1	2016-04-19		2.12	212	9	16.3	6.58	149	0.059	0	8.11	85.5	0.038
MANGABEIRA 1	CM1	2016-04-19		2.13	213	10	16.3	6.56	139	0.059	0	7.93	83.6	0.038
MANGABEIRA 1	CM1	2016-05-17		0.5	50	1	18.35	7.66	152	0.069	2.8	15.23	167	0.045
MANGABEIRA 1	CM1	2016-05-17		0.6	60	2	18.35	7.62	133	0.069	2.8	13.14	144.1	0.045
MANGABEIRA 1	CM1	2016-05-17		0.7	70	3	18.34	7.59	117	0.069	2.8	11.82	129.5	0.045
MANGABEIRA 1	CM1	2016-05-17		0.8	80	4	18.35	7.57	104	0.069	2.7	11.09	121.5	0.045
MANGABEIRA 1	CM1	2016-05-17		0.9	90	5	18.35	7.55	95	0.069	2.8	10.6	116.2	0.045
MANGABEIRA 1	CM1	2016-05-17		0.1	10	6	18.35	7.53	89	0.069	2.7	10.26	112.5	0.045
MANGABEIRA 1	CM1	2016-05-17		0.11	11	7	18.34	7.52	85	0.069	3.2	10.03	109.9	0.045
MANGABEIRA 1	CM1	2016-05-17		0.12	12	8	18.34	7.51	83	0.069	2.9	9.85	107.9	0.045
MANGABEIRA 1	CM1	2016-05-17		0.13	13	9	18.34	7.5	83	0.069	2.7	9.69	106.2	0.045
MANGABEIRA 1	CM1	2016-05-17		0.14	14	10	18.35	7.49	83	0.069	2.7	9.57	104.9	0.045
MANGABEIRA 1	CM1	2016-06-21		0.2	20	1	16.33	7.08	122	0.059	3	7.74	81.5	0.038
MANGABEIRA 1	CM1	2016-06-21		0.3	30	2	16.32	7.02	119	0.059	3.1	7.7	81	0.038
MANGABEIRA 1	CM1	2016-06-21		0.4	40	3	16.31	6.93	118	0.059	3	7.64	80.4	0.038
MANGABEIRA 1	CM1	2016-06-21		0.5	50	4	16.31	6.87	118	0.059	3	7.59	79.8	0.038
MANGABEIRA 1	CM1	2016-06-21		0.6	60	5	16.31	6.8	117	0.059	3.1	7.54	79.3	0.038
MANGABEIRA 1	CM1	2016-06-21		0.7	70	6	16.31	6.76	114	0.059	2.9	7.52	79.1	0.038
MANGABEIRA 1	CM1	2016-06-21		0.8	80	7	16.31	6.78	108	0.059	2.7	7.52	79.2	0.038
MANGABEIRA 1	CM1	2016-06-21		0.9	90	8	16.31	6.81	106	0.059	3	7.51	79.1	0.038
MANGABEIRA 1	CM1	2016-06-21		0.1	10	9	16.31	6.8	106	0.059	2.9	7.48	78.7	0.038
MANGABEIRA 1	CM1	2016-06-21		0.11	11	10	16.31	6.78	104	0.059	3.1	7.45	78.4	0.038
MANGABEIRA 1	CM1	2016-07-19		0	0	1	16.25	6.71	109	0.063	2.8	8.45	88.9	0.041
MANGABEIRA 1	CM1	2016-07-19		0.1	10	2	16.25	6.68	106	0.063	2.8	8.32	87.4	0.041
MANGABEIRA 1	CM1	2016-07-19		0.2	20	3	16.25	6.64	104	0.063	2.9	8.2	86.1	0.041
MANGABEIRA 1	CM1	2016-07-19		0.3	30	4	16.25	6.59	104	0.063	3.3	8.09	85.1	0.041
MANGABEIRA 1	CM1	2016-07-19		0.4	40	5	16.25	6.53	104	0.063	2.9	8	84.1	0.041
MANGABEIRA 1	CM1	2016-07-19		0.5	50	6	16.25	6.51	104	0.063	2.8	7.94	83.5	0.041
MANGABEIRA 1	CM1	2016-07-19		0.6	60	7	16.26	6.49	103	0.063	2.8	7.89	82.9	0.041
MANGABEIRA 1	CM1	2016-07-19		0.7	70	8	16.26	6.48	102	0.063	2.9	7.84	82.4	0.041
MANGABEIRA 1	CM1	2016-07-19		0.8	80	9	16.26	6.47	102	0.063	3	7.78	81.8	0.041
MANGABEIRA 1	CM1	2016-07-19		0.9	90	10	16.26	6.47	101	0.063	2.7	7.73	81.3	0.041
MANGABEIRA 1	CM1	2016-08-16		0.8	80	1	15.42	7.46	140	0.067	1.7	7.69	79.4	0.044
MANGABEIRA 1	CM1	2016-08-16		0.9	90	2	15.41	7.43	135	0.067	1.7	7.39	76.3	0.044
MANGABEIRA 1	CM1	2016-08-16		0.1	10	3	15.41	7.41	131	0.067	2.8	7.12	73.6	0.044
MANGABEIRA 1	CM1	2016-08-16		0.11	11	4	15.42	7.38	129	0.067	2.7	7.07	73	0.044
MANGABEIRA 1	CM1	2016-08-16		0.12	12	5	15.34	7.35	126	0.067	0.8	7.24	74.7	0.044
MANGABEIRA 1	CM1	2016-08-16		0.13	13	6	15.32	7.33	123	0.067	0.8	7.3	75.3	0.044
MANGABEIRA 1	CM1	2016-08-16		0.14	14	7	15.31	7.32	121	0.067	0.5	7.27	74.9	0.044
MANGABEIRA 1	CM1	2016-08-16		0.15	15	8	15.31	7.3	119	0.067	0.5	7.25	74.8	0.044
MANGABEIRA 1	CM1	2016-08-16		0.16	16	9	15.31	7.28	118	0.067	0.6	7.21	74.3	0.044
MANGABEIRA 1	CM1	2016-08-16		0.17	17	10	15.31	7.26	117	0.067	0.6	7.19	74.1	0.044
MANGABEIRA 1	CM1	2016-09-20		0.1	10	1	18.7	7.91	193	0.086	4	6.86	75.7	0.056
MANGABEIRA 1	CM1	2016-09-20		0.2	20	2	18.69	7.88	192	0.085	5.1	6.68	73.7	0.056
MANGABEIRA 1	CM1	2016-09-20		0.3	30	3	18.68	7.85	192	0.086	4.8	6.72	74.2	0.056
MANGABEIRA 1	CM1	2016-09-20		0.4	40	4	18.63	7.82	191	0.086	3.6	6.74	74.3	0.056
MANGABEIRA 1	CM1	2016-09-20		0.5	50	5	18.6	7.8	191	0.086	2.9	6.65	73.2	0.056
MANGABEIRA 1	CM1	2016-09-20		0.6	60	6	18.58	7.78	190	0.086	2.6	6.42	70.7	0.056
MANGABEIRA 1	CM1	2016-09-20		0.7	70	7	18.59	7.76	189	0.085	2.5	6.27	69.1	0.055
MANGABEIRA 1	CM1	2016-09-20		0.8	80	8	18.59	7.74	189	0.085	2.5	6.26	69	0.055
MANGABEIRA 1	CM1	2016-09-20		0.9	90	9	18.55	7.72	188	0.085	2.6	6.28	69.1	0.055
MANGABEIRA 1	CM1	2016-09-20		0.1	10	10	18.55	7.7	188	0.085	2.7	6.28	69.1	0.055
MANGABEIRA 1	CM1	2016-10-18		3.7	370	1	19.09	7.52	134	0.076	18.8	8.95	99.5	0.049
MANGABEIRA 1	CM1	2016-10-18		3.8	380	2	19.07	7.5	128	0.077	18.9	8.74	97.1	0.05
MANGABEIRA 1	CM1	2016-10-18		3.9	390	3	19.07	7.48	123	0.077	19.1	8.58	95.4	0.05
MANGABEIRA 1	CM1	2016-10-18		3.1	310	4	19.06	7.46	118	0.077	19.5	8.49	94.4	0.05
MANGABEIRA 1	CM1	2016-10-18		3.11	311	5	19.05	7.44	113	0.077	19.4	8.37	93	0.05
MANGABEIRA 1	CM1	2016-10-18		3.12	312	6	19.04	7.41	110	0.077	19.6	8.36	92.8	0.05
MANGABEIRA 1	CM1	2016-10-18		3.13	313	7	19.03	7.39	107	0.077	19.6	8.32	92.4	0.05
MANGABEIRA 1	CM1	2016-10-18		3.14	314	8	19.02	7.37	104	0.077	19.9	8.29	92	0.05
MANGABEIRA 1	CM1	2016-10-18		3.15	315	9	19.02	7.35	102	0.077	19.9	8.23	91.4	0.05
MANGABEIRA 1	CM1	2016-10-18		3.16	316	10	19.02	7.32	100	0.077	19.5	8.16	90.6	0.05
MANGABEIRA 1	CM1	2016-11-15		1.9	190	1	18.7	7.91	193	0.086	4	6.86	75.7	0.056
MANGABEIRA 1	CM1	2016-11-15		1.1	110	2	18.69	7.88	192	0.085	5.1	6.68	73.7	0.056
MANGABEIRA 1	CM1	2016-11-15		1.11	111	3	18.68	7.85	192	0.086	4.8	6.72	74.2	0.056
MANGABEIRA 1	CM1	2016-11-15		1.12	112	4	18.63	7.82	191	0.086	3.6	6.74	74.3	0.056
MANGABEIRA 1	CM1	2016-11-15		1.13	113	5	18.6	7.8	191	0.086	2.9	6.65	73.2	0.056
MANGABEIRA 1	CM1	2016-11-15		1.14	114	6	18.58	7.78	190	0.086	2.6	6.42	70.7	0.056
MANGABEIRA 1	CM1	2016-11-15		1.15	115	7	18.59	7.76	189	0.085	2.5	6.27	69.1	0.055
MANGABEIRA 1	CM1	2016-11-15		1.16	116	8	18.59	7.74	189	0.085	2.5	6.26	69	0.055
MANGABEIRA 1	CM1	2016-11-15		1.17	117	9	18.55	7.72	188	0.085	2.6	6.28	69.1	0.055
MANGABEIRA 1	CM1	2016-11-15		1.18	118	10	18.55	7.7	188	0.085	2.7	6.28	69.1	0.055
MANGABEIRA 1	CM1	2016-12-20		2.3	230	1	19.09	7.52	134	0.076	18.8	8.95	99.5	0.049
MANGABEIRA 1	CM1	2016-12-20		2.4	240	2	19.07	7.5	128	0.077	18.9	8.74	97.1	0.05
MANGABEIRA 1	CM1	2016-12-20		2.5	250	3	19.07	7.48	123	0.077	19.1	8.58	95.4	0.05
MANGABEIRA 1	CM1	2016-12-20		2.6	260	4	19.06	7.46	118	0.077	19.5	8.49	94.4	0.05
MANGABEIRA 1	CM1	2016-12-20		2.7	270	5	19.05	7.44	113	0.077	19.4	8.37	93	0.05
MANGABEIRA 1	CM1	2016-12-20		2.8	280	6	19.04	7.41	110	0.077	19.6	8.36	92.8	0.05
MANGABEIRA 1	CM1	2016-12-20		2.9	290	7	19.03	7.39	107	0.077	19.6	8.32	92.4	0.05
MANGABEIRA 1	CM1	2016-12-20		2.1	210	8	19.02	7.37	104	0.077	19.9	8.29	92	0.05
MANGABEIRA 1	CM1	2016-12-20		2.11	211	9	19.02	7.35	102	0.077	19.9	8.23	91.4	0.05
MANGABEIRA 1	CM1	2016-12-20		2.12	212	10	19.02	7.32	100	0.077	19.5	8.16	90.6	0.05
MANGABEIRA 1	CM1	2017-01-17		10.9	1090	1	19.99	7.45	209	0.034	8.9	6.83	77.2	0.022
MANGABEIRA 1	CM1	2017-01-17		10.1	1010	2	20	7.44	208	0.034	5.1	6.81	77.1	0.022
MANGABEIRA 1	CM1	2017-01-17		10.11	1011	3	20.03	7.45	206	0.034	5.4	6.86	77.6	0.022
MANGABEIRA 1	CM1	2017-01-17		10.12	1012	4	20.01	7.44	205	0.034	4.9	6.56	74.2	0.022
MANGABEIRA 1	CM1	2017-01-17		10.13	1013	5	20.04	7.44	204	0.034	1.6	6.44	72.9	0.022
MANGABEIRA 1	CM1	2017-01-17		10.14	1014	6	20.06	7.45	202	0.034	1.1	6.74	76.3	0.022
MANGABEIRA 1	CM1	2017-01-17		10.15	1015	7	20.04	7.48	199	0.034	0.7	6.65	75.2	0.022
MANGABEIRA 1	CM1	2017-01-17		10.16	1016	8	20.06	7.48	199	0.034	0.9	6.47	73.2	0.022
MANGABEIRA 1	CM1	2017-01-17		10.17	1017	9	20.09	7.45	189	0.034	0.7	6.06	68.7	0.022
MANGABEIRA 1	CM1	2017-01-17		10.18	1018	10	20.1	7.47	186	0.034	0.9	6.48	73.4	0.022
MANGABEIRA 2	CM2	2016-01-19		2	200	1	23.49	6.77	143	0.054	6.1	7.54	90.6	0.035
MANGABEIRA 2	CM2	2016-01-19		2.1	210	2	23.49	6.73	145	0.054	6.2	7.4	89	0.035
MANGABEIRA 2	CM2	2016-01-19		2.2	220	3	23.48	6.68	148	0.054	6.3	7.36	88.5	0.035
MANGABEIRA 2	CM2	2016-01-19		2.3	230	4	23.48	6.66	147	0.054	5.9	7.38	88.8	0.035
MANGABEIRA 2	CM2	2016-01-19		2.4	240	5	23.47	6.66	146	0.054	5.8	7.38	88.7	0.035
MANGABEIRA 2	CM2	2016-01-19		2.5	250	6	23.46	6.63	147	0.054	5.8	7.35	88.3	0.035
MANGABEIRA 2	CM2	2016-01-19		2.6	260	7	23.46	6.61	149	0.054	5.9	7.35	88.3	0.035
MANGABEIRA 2	CM2	2016-01-19		2.7	270	8	23.46	6.6	149	0.054	6	7.32	87.9	0.035
MANGABEIRA 2	CM2	2016-01-19		2.8	280	9	23.46	6.56	152	0.054	5.8	7.31	87.9	0.035
MANGABEIRA 2	CM2	2016-01-19		2.9	290	10	23.46	6.53	154	0.054	6	7.39	88.8	0.035
MANGABEIRA 2	CM2	2016-02-16		5.9	590	1	23.23	6.23	227	0.032	2.1	4.98	59.6	0.021
MANGABEIRA 2	CM2	2016-02-16		5.1	510	2	23.25	6.19	226	0.032	1.5	4.28	51.3	0.021
MANGABEIRA 2	CM2	2016-02-16		5.11	511	3	23.28	6.17	226	0.032	1.3	3.84	46	0.021
MANGABEIRA 2	CM2	2016-02-16		5.12	512	4	23.28	6.15	226	0.032	2.6	3.55	42.6	0.021
MANGABEIRA 2	CM2	2016-02-16		5.13	513	5	23.29	6.14	226	0.032	1.9	3.39	40.7	0.021
MANGABEIRA 2	CM2	2016-02-16		5.14	514	6	23.29	6.13	227	0.032	1.3	3.31	39.7	0.021
MANGABEIRA 2	CM2	2016-02-16		5.15	515	7	23.31	6.12	227	0.032	1.3	3.25	38.9	0.021
MANGABEIRA 2	CM2	2016-02-16		5.16	516	8	23.31	6.11	228	0.032	1.3	3.18	38.1	0.021
MANGABEIRA 2	CM2	2016-02-16		5.17	517	9	23.31	6.1	229	0.032	1.3	3.12	37.4	0.021
MANGABEIRA 2	CM2	2016-02-16		5.18	518	10	23.3	6.06	231	0.032	1.3	3.17	38	0.021
MANGABEIRA 2	CM2	2016-03-15		4	400	1	23.28	6.84	165	0.075	3.2	7.97	95.5	0.049
MANGABEIRA 2	CM2	2016-03-15		4.1	410	2	23.26	6.83	159	0.075	3	7.66	91.7	0.049
MANGABEIRA 2	CM2	2016-03-15		4.2	420	3	23.25	6.81	156	0.075	3.3	6.77	81.1	0.049
MANGABEIRA 2	CM2	2016-03-15		4.3	430	4	23.24	6.8	155	0.075	3.2	6.25	74.9	0.049
MANGABEIRA 2	CM2	2016-03-15		4.4	440	5	23.22	6.78	154	0.075	3.2	6.13	73.3	0.049
MANGABEIRA 2	CM2	2016-03-15		4.5	450	6	23.23	6.77	153	0.075	3.1	6	71.9	0.049
MANGABEIRA 2	CM2	2016-03-15		4.6	460	7	23.23	6.76	151	0.075	3.1	5.93	71	0.049
MANGABEIRA 2	CM2	2016-03-15		4.7	470	8	23.22	6.74	150	0.075	3	5.86	70.2	0.049
MANGABEIRA 2	CM2	2016-03-15		4.8	480	9	23.21	6.73	149	0.075	3.2	5.85	70	0.049
MANGABEIRA 2	CM2	2016-03-15		4.9	490	10	23.21	6.71	149	0.075	3.2	5.83	69.8	0.049
MANGABEIRA 2	CM2	2016-04-19		2.4	240	1	23.19	7.07	110	0.088	3.2	9.99	119.5	0.057
MANGABEIRA 2	CM2	2016-04-19		2.5	250	2	23.17	7.07	105	0.088	3.3	9.93	118.8	0.057
MANGABEIRA 2	CM2	2016-04-19		2.6	260	3	23.15	7.07	100	0.088	3.1	9.88	118.2	0.057
MANGABEIRA 2	CM2	2016-04-19		2.7	270	4	23.14	7.06	97	0.088	3.3	9.85	117.7	0.057
MANGABEIRA 2	CM2	2016-04-19		2.8	280	5	23.15	7.06	96	0.088	3.4	9.8	117.1	0.057
MANGABEIRA 2	CM2	2016-04-19		2.9	290	6	23.12	7.06	94	0.088	3.5	9.13	109.1	0.057
MANGABEIRA 2	CM2	2016-04-19		2.1	210	7	23.1	7.05	94	0.088	3.8	8.23	98.3	0.057
MANGABEIRA 2	CM2	2016-04-19		2.11	211	8	23.09	7.03	97	0.088	3.4	7.9	94.4	0.057
MANGABEIRA 2	CM2	2016-04-19		2.12	212	9	23.09	7.03	100	0.088	3.3	7.72	92.3	0.057
MANGABEIRA 2	CM2	2016-04-19		2.13	213	10	23.11	7.02	98	0.088	3.2	7.67	91.6	0.057
MANGABEIRA 2	CM2	2016-05-17		0.5	50	1	18.35	7.45	87	0.069	2.8	8.99	98.6	0.045
MANGABEIRA 2	CM2	2016-05-17		0.6	60	2	18.34	7.45	87	0.069	2.7	8.98	98.5	0.045
MANGABEIRA 2	CM2	2016-05-17		0.7	70	3	18.34	7.44	87	0.069	2.7	8.93	97.9	0.045
MANGABEIRA 2	CM2	2016-05-17		0.8	80	4	18.34	7.47	90	0.069	2.9	9.32	102.1	0.045
MANGABEIRA 2	CM2	2016-05-17		0.9	90	5	18.35	7.46	89	0.069	3	9.25	101.5	0.045
MANGABEIRA 2	CM2	2016-05-17		0.1	10	6	18.34	7.46	88	0.069	2.8	9.21	100.9	0.045
MANGABEIRA 2	CM2	2016-05-17		0.11	11	7	18.34	7.46	87	0.069	3.1	9.03	99	0.045
MANGABEIRA 2	CM2	2016-05-17		0.12	12	8	18.34	7.46	86	0.069	3	8.96	98.2	0.045
MANGABEIRA 2	CM2	2016-05-17		0.13	13	9	18.34	7.46	86	0.069	3	8.99	98.6	0.045
MANGABEIRA 2	CM2	2016-05-17		0.14	14	10	18.35	7.45	87	0.069	2.8	9.02	98.8	0.045
MANGABEIRA 2	CM2	2016-06-21		0.2	20	1	17.44	6.56	198	0.074	3.2	6.63	71.4	0.048
MANGABEIRA 2	CM2	2016-06-21		0.3	30	2	17.44	6.58	192	0.073	3.2	6.5	70	0.048
MANGABEIRA 2	CM2	2016-06-21		0.4	40	3	17.45	6.58	187	0.073	3.3	6.5	70	0.048
MANGABEIRA 2	CM2	2016-06-21		0.5	50	4	17.44	6.56	184	0.073	3.4	6.58	70.9	0.048
MANGABEIRA 2	CM2	2016-06-21		0.6	60	5	17.45	6.57	179	0.073	3.4	6.52	70.2	0.048
MANGABEIRA 2	CM2	2016-06-21		0.7	70	6	17.46	6.58	175	0.073	3.3	6.5	70.1	0.048
MANGABEIRA 2	CM2	2016-06-21		0.8	80	7	19.99	7.45	209	0.034	8.9	6.83	77.2	0.022
MANGABEIRA 2	CM2	2016-06-21		0.9	90	8	20	7.44	208	0.034	5.1	6.81	77.1	0.022
MANGABEIRA 2	CM2	2016-06-21		0.1	10	9	20.03	7.45	206	0.034	5.4	6.86	77.6	0.022
MANGABEIRA 2	CM2	2016-06-21		0.11	11	10	20.01	7.44	205	0.034	4.9	6.56	74.2	0.022
MANGABEIRA 2	CM2	2016-07-19		0	0	1	17.54	6.44	178	0.079	5.4	7.4	79.9	0.051
MANGABEIRA 2	CM2	2016-07-19		0.1	10	2	17.55	6.45	176	0.079	7.1	7.15	77.2	0.051
MANGABEIRA 2	CM2	2016-07-19		0.2	20	3	17.53	6.43	176	0.079	5.2	6.94	74.9	0.051
MANGABEIRA 2	CM2	2016-07-19		0.3	30	4	17.52	6.41	176	0.079	4.2	6.9	74.4	0.051
MANGABEIRA 2	CM2	2016-07-19		0.4	40	5	17.52	6.38	177	0.079	3.7	6.71	72.4	0.051
MANGABEIRA 2	CM2	2016-07-19		0.5	50	6	17.52	6.35	178	0.079	3.6	6.62	71.4	0.051
MANGABEIRA 2	CM2	2016-07-19		0.6	60	7	17.53	6.32	178	0.079	4	6.62	71.4	0.051
MANGABEIRA 2	CM2	2016-07-19		0.7	70	8	17.53	6.29	179	0.079	4	6.56	70.8	0.051
MANGABEIRA 2	CM2	2016-07-19		0.8	80	9	17.53	6.26	180	0.079	3.9	6.57	70.9	0.051
MANGABEIRA 2	CM2	2016-07-19		0.9	90	10	17.53	6.25	180	0.079	3.9	6.49	70.1	0.051
MANGABEIRA 2	CM2	2016-08-16		0.8	80	1	17.42	6.65	226	0.074	3.2	7.74	83.4	0.048
MANGABEIRA 2	CM2	2016-08-16		0.9	90	2	17.43	6.57	224	0.074	3.4	7.33	78.9	0.048
MANGABEIRA 2	CM2	2016-08-16		0.1	10	3	17.44	6.53	218	0.074	3.3	7.12	76.7	0.048
MANGABEIRA 2	CM2	2016-08-16		0.11	11	4	17.44	6.53	212	0.074	3.3	7.03	75.7	0.048
MANGABEIRA 2	CM2	2016-08-16		0.12	12	5	17.44	6.54	204	0.074	3.3	6.89	74.2	0.048
MANGABEIRA 2	CM2	2016-08-16		0.13	13	6	17.44	6.56	198	0.074	3.2	6.63	71.4	0.048
MANGABEIRA 2	CM2	2016-08-16		0.14	14	7	17.44	6.58	192	0.073	3.2	6.5	70	0.048
MANGABEIRA 2	CM2	2016-08-16		0.15	15	8	17.45	6.58	187	0.073	3.3	6.5	70	0.048
MANGABEIRA 2	CM2	2016-08-16		0.16	16	9	17.44	6.56	184	0.073	3.4	6.58	70.9	0.048
MANGABEIRA 2	CM2	2016-08-16		0.17	17	10	17.45	6.57	179	0.073	3.4	6.52	70.2	0.048
MANGABEIRA 2	CM2	2016-09-20		0.1	10	1	18.57	7.71	119	0.076	0	6.72	74	0.049
MANGABEIRA 2	CM2	2016-09-20		0.2	20	2	18.57	7.7	115	0.076	0	6.65	73.2	0.049
MANGABEIRA 2	CM2	2016-09-20		0.3	30	3	18.57	7.69	111	0.076	0	6.64	73.1	0.049
MANGABEIRA 2	CM2	2016-09-20		0.4	40	4	18.57	7.68	108	0.076	0	6.62	72.8	0.049
MANGABEIRA 2	CM2	2016-09-20		0.5	50	5	18.56	7.67	105	0.076	0	6.57	72.3	0.049
MANGABEIRA 2	CM2	2016-09-20		0.6	60	6	18.56	7.66	102	0.076	0	6.52	71.7	0.049
MANGABEIRA 2	CM2	2016-09-20		0.7	70	7	18.56	7.65	100	0.076	0	6.5	71.6	0.049
MANGABEIRA 2	CM2	2016-09-20		0.8	80	8	18.56	7.64	98	0.076	0	6.49	71.4	0.049
MANGABEIRA 2	CM2	2016-09-20		0.9	90	9	18.56	7.63	96	0.076	0	6.48	71.3	0.049
MANGABEIRA 2	CM2	2016-09-20		0.1	10	10	18.56	7.63	94	0.076	0	6.46	71.1	0.049
MANGABEIRA 2	CM2	2016-10-18		3.7	370	1	18.73	7.95	193	0.086	3.9	7.06	78	0.056
MANGABEIRA 2	CM2	2016-10-18		3.8	380	2	18.55	7.69	187	0.085	2.6	6.27	69	0.055
MANGABEIRA 2	CM2	2016-10-18		3.9	390	3	18.54	7.68	186	0.085	2.6	6.22	68.5	0.055
MANGABEIRA 2	CM2	2016-10-18		3.1	310	4	18.54	7.66	185	0.085	2.7	6.26	68.9	0.055
MANGABEIRA 2	CM2	2016-10-18		3.11	311	5	18.5	7.65	184	0.085	6	6.2	68.1	0.055
MANGABEIRA 2	CM2	2016-10-18		3.12	312	6	18.51	7.64	183	0.085	9.8	6.15	67.6	0.055
MANGABEIRA 2	CM2	2016-10-18		3.13	313	7	18.58	7.76	133	0.076	0	7.22	79.5	0.049
MANGABEIRA 2	CM2	2016-10-18		3.14	314	8	18.58	7.74	128	0.076	0	6.99	77	0.049
MANGABEIRA 2	CM2	2016-10-18		3.15	315	9	18.58	7.72	124	0.076	0	6.83	75.2	0.049
MANGABEIRA 2	CM2	2016-10-18		3.16	316	10	18.56	7.62	93	0.076	0	6.48	71.3	0.049
MANGABEIRA 2	CM2	2016-11-15		1.9	190	1	18.97	7.35	124	0.087	3.8	8.91	98.9	0.056
MANGABEIRA 2	CM2	2016-11-15		1.1	110	2	18.97	7.35	123	0.086	3.7	8.87	98.4	0.056
MANGABEIRA 2	CM2	2016-11-15		1.11	111	3	18.97	7.34	120	0.087	3.7	8.95	99.3	0.057
MANGABEIRA 2	CM2	2016-11-15		1.12	112	4	18.97	7.33	118	0.088	3.9	9.2	102.1	0.057
MANGABEIRA 2	CM2	2016-11-15		1.13	113	5	18.97	7.32	116	0.088	3.7	9.37	103.9	0.057
MANGABEIRA 2	CM2	2016-11-15		1.14	114	6	18.97	7.32	114	0.088	3.6	9.2	102.1	0.057
MANGABEIRA 2	CM2	2016-11-15		1.15	115	7	18.98	7.31	112	0.088	3.8	8.91	98.9	0.057
MANGABEIRA 2	CM2	2016-11-15		1.16	116	8	18.98	7.31	111	0.087	3.8	8.7	96.5	0.057
MANGABEIRA 2	CM2	2016-11-15		1.17	117	9	18.98	7.31	110	0.087	3.7	8.61	95.6	0.056
MANGABEIRA 2	CM2	2016-11-15		1.18	118	10	18.97	7.3	110	0.087	3.8	8.57	95.1	0.057
MANGABEIRA 2	CM2	2016-12-20		2.3	230	1	19.02	7.35	102	0.077	19.9	8.23	91.4	0.05
MANGABEIRA 2	CM2	2016-12-20		2.4	240	2	19.02	7.32	100	0.077	19.5	8.16	90.6	0.05
MANGABEIRA 2	CM2	2016-12-20		2.5	250	3	19.2	7.14	174	0.091	3.2	9.03	100.6	0.059
MANGABEIRA 2	CM2	2016-12-20		2.6	260	4	19.19	7.1	174	0.091	2.5	8.58	95.6	0.059
MANGABEIRA 2	CM2	2016-12-20		2.7	270	5	19.17	7.06	174	0.091	2.3	8.4	93.5	0.059
MANGABEIRA 2	CM2	2016-12-20		2.8	280	6	19.13	7.02	174	0.091	1.8	8.21	91.4	0.059
MANGABEIRA 2	CM2	2016-12-20		2.9	290	7	19.11	7	173	0.091	1.6	8.04	89.5	0.059
MANGABEIRA 2	CM2	2016-12-20		2.1	210	8	19.09	6.98	172	0.091	1.4	7.96	88.5	0.059
MANGABEIRA 2	CM2	2016-12-20		2.11	211	9	19.09	6.95	171	0.091	1.4	7.81	86.8	0.059
MANGABEIRA 2	CM2	2016-12-20		2.12	212	10	19.09	6.93	171	0.091	1.5	7.68	85.4	0.059
MANGABEIRA 2	CM2	2017-01-17		10.9	1090	1	20.91	7.34	179	0.073	7.6	9.87	120.7	0.047
MANGABEIRA 2	CM2	2017-01-17		10.1	1010	2	20.91	7.33	175	0.073	7.5	9.63	117.7	0.047
MANGABEIRA 2	CM2	2017-01-17		10.11	1011	3	20.91	7.31	171	0.073	7.4	9.32	113.9	0.047
MANGABEIRA 2	CM2	2017-01-17		10.12	1012	4	20.91	7.29	167	0.073	7.6	9.17	112.1	0.047
MANGABEIRA 2	CM2	2017-01-17		10.13	1013	5	20.91	7.27	164	0.073	7.6	9.05	110.6	0.047
MANGABEIRA 2	CM2	2017-01-17		10.14	1014	6	20.91	7.25	160	0.073	8	8.94	109.2	0.047
MANGABEIRA 2	CM2	2017-01-17		10.15	1015	7	20.91	7.23	157	0.073	7.4	8.8	107.4	0.047
MANGABEIRA 2	CM2	2017-01-17		10.16	1016	8	20.91	7.21	155	0.072	7.6	8.72	106.5	0.047
MANGABEIRA 2	CM2	2017-01-17		10.17	1017	9	20.91	7.19	152	0.073	7.5	8.63	105.3	0.047
MANGABEIRA 2	CM2	2017-01-17		10.18	1018	10	20.91	7.17	150	0.073	7.7	8.5	103.8	0.047
BORÁ 1	CB1	2016-01-19		2	200	1	23.63	6.66	190	0.023	130	8.55	103.1	0.015
BORÁ 1	CB1	2016-01-19		2.1	210	2	23.63	6.73	179	0.023	130	8.42	101.5	0.015
BORÁ 1	CB1	2016-01-19		2.2	220	3	23.62	6.72	174	0.023	131	8.29	99.9	0.015
BORÁ 1	CB1	2016-01-19		2.3	230	4	23.61	6.69	172	0.023	130	8.22	99	0.015
BORÁ 1	CB1	2016-01-19		2.4	240	5	23.61	6.68	169	0.023	130	8.12	97.9	0.015
BORÁ 1	CB1	2016-01-19		2.5	250	6	23.61	6.71	163	0.023	131	8.11	97.7	0.015
BORÁ 1	CB1	2016-01-19		2.6	260	7	23.6	6.7	161	0.023	133	8.08	97.3	0.015
BORÁ 1	CB1	2016-01-19		2.7	270	8	23.6	6.67	162	0.023	130	8	96.3	0.015
BORÁ 1	CB1	2016-01-19		2.8	280	9	23.6	6.67	162	0.023	129	7.97	96	0.015
BORÁ 1	CB1	2016-01-19		2.9	290	10	23.59	6.64	163	0.023	129	7.9	95.1	0.015
BORÁ 1	CB1	2016-02-16		5.9	590	1	23.4	6.55	197	0.032	6.3	8.05	96.6	0.021
BORÁ 1	CB1	2016-02-16		5.1	510	2	23.38	6.52	193	0.032	6.1	8.02	96.2	0.021
BORÁ 1	CB1	2016-02-16		5.11	511	3	23.36	6.47	189	0.031	5.8	7.95	95.4	0.02
BORÁ 1	CB1	2016-02-16		5.12	512	4	23.34	6.4	182	0.031	5.6	7.96	95.5	0.02
BORÁ 1	CB1	2016-02-16		5.13	513	5	23.35	6.41	173	0.031	5	8.12	97.5	0.02
BORÁ 1	CB1	2016-02-16		5.14	514	6	23.36	6.46	170	0.031	5.6	8.25	99	0.02
BORÁ 1	CB1	2016-02-16		5.15	515	7	23.35	6.44	170	0.032	5.5	8.24	98.8	0.021
BORÁ 1	CB1	2016-02-16		5.16	516	8	23.35	6.43	166	0.032	6.1	8.22	98.6	0.02
BORÁ 1	CB1	2016-02-16		5.17	517	9	23.36	6.43	166	0.032	6.2	8.19	98.2	0.02
BORÁ 1	CB1	2016-02-16		5.18	518	10	23.35	6.41	168	0.031	6.3	8.16	97.9	0.02
BORÁ 1	CB1	2016-03-15		4	400	1	24	7.25	112	0.03	5.1	6.88	83.4	0.019
BORÁ 1	CB1	2016-03-15		4.1	410	2	24.01	7.32	111	0.029	4.5	6.61	80.2	0.019
BORÁ 1	CB1	2016-03-15		4.2	420	3	24.04	7.46	111	0.026	4.6	6.4	77.6	0.017
BORÁ 1	CB1	2016-03-15		4.3	430	4	24.05	7.48	111	0.016	4.7	6.33	76.8	0.011
BORÁ 1	CB1	2016-03-15		4.4	440	5	24.07	7.49	112	0.009	4.7	6.25	75.9	0.006
BORÁ 1	CB1	2016-03-15		4.5	450	6	24.07	7.5	111	0	4.7	6.19	75.2	0
BORÁ 1	CB1	2016-03-15		4.6	460	7	24.07	7.5	111	0	4.6	6.21	75.3	0
BORÁ 1	CB1	2016-03-15		4.7	470	8	24.05	7.5	111	0	4.6	6.19	75.1	0
BORÁ 1	CB1	2016-03-15		4.8	480	9	24.02	7.52	112	0.001	6	6.3	76.4	0.001
BORÁ 1	CB1	2016-03-15		4.9	490	10	24.03	7.54	111	0	33.3	6.66	80.8	0
BORÁ 1	CB1	2016-04-19		2.4	240	1	23.45	7.25	97	0	135	9.16	110	0
BORÁ 1	CB1	2016-04-19		2.5	250	2	23.47	7.37	97	0	135	9.13	109.8	0
BORÁ 1	CB1	2016-04-19		2.6	260	3	23.5	7.44	97	0	135	9.11	109.5	0
BORÁ 1	CB1	2016-04-19		2.7	270	4	23.52	7.48	97	0	135	9.09	109.4	0
BORÁ 1	CB1	2016-04-19		2.8	280	5	23.56	7.49	96	0	135	9.07	109.2	0
BORÁ 1	CB1	2016-04-19		2.9	290	6	23.58	7.49	96	0	135	9.05	109	0
BORÁ 1	CB1	2016-04-19		2.1	210	7	23.6	7.49	96	0	135	9.03	108.8	0
BORÁ 1	CB1	2016-04-19		2.11	211	8	23.62	7.47	96	0	135	9.02	108.6	0
BORÁ 1	CB1	2016-04-19		2.12	212	9	23.64	7.45	95	0	135	9	108.5	0
BORÁ 1	CB1	2016-04-19		2.13	213	10	23.65	7.43	95	0	135	8.99	108.4	0
BORÁ 1	CB1	2016-05-17		0.5	50	1	21.21	7.57	211	0.036	0.3	7.49	86.6	0.024
BORÁ 1	CB1	2016-05-17		0.6	60	2	21.23	7.57	211	0.036	0.4	7.44	86	0.023
BORÁ 1	CB1	2016-05-17		0.7	70	3	21.24	7.56	211	0.036	0.5	7.24	83.8	0.023
BORÁ 1	CB1	2016-05-17		0.8	80	4	21.26	7.56	210	0.035	0.5	7.13	82.4	0.023
BORÁ 1	CB1	2016-05-17		0.9	90	5	21.27	7.55	210	0.035	0.5	7.06	81.7	0.023
BORÁ 1	CB1	2016-05-17		0.1	10	6	21.28	7.55	210	0.035	0.5	7.1	82.2	0.023
BORÁ 1	CB1	2016-05-17		0.11	11	7	21.29	7.54	210	0.035	0.5	7.31	84.6	0.023
BORÁ 1	CB1	2016-05-17		0.12	12	8	21.29	7.52	211	0.035	0.4	7.28	84.2	0.023
BORÁ 1	CB1	2016-05-17		0.13	13	9	21.29	7.51	211	0.035	0.4	7.18	83.1	0.023
BORÁ 1	CB1	2016-05-17		0.14	14	10	21.3	7.53	209	0.035	0.5	7.15	82.8	0.023
BORÁ 1	CB1	2016-06-21		0.2	20	1	16.49	7.69	183	0.076	1	7.64	80.7	0.05
BORÁ 1	CB1	2016-06-21		0.3	30	2	16.48	7.67	181	0.076	1	7.56	79.9	0.05
BORÁ 1	CB1	2016-06-21		0.4	40	3	16.48	7.68	178	0.076	1.1	7.55	79.7	0.05
BORÁ 1	CB1	2016-06-21		0.5	50	4	16.48	7.67	176	0.076	1.1	7.55	79.8	0.05
BORÁ 1	CB1	2016-06-21		0.6	60	5	16.48	7.68	173	0.076	1.1	7.52	79.5	0.05
BORÁ 1	CB1	2016-06-21		0.7	70	6	16.48	7.66	172	0.076	1.1	7.49	79.2	0.05
BORÁ 1	CB1	2016-06-21		0.8	80	7	16.48	7.65	170	0.077	1	7.48	79	0.05
BORÁ 1	CB1	2016-06-21		0.9	90	8	16.48	7.65	167	0.077	1	7.44	78.6	0.05
BORÁ 1	CB1	2016-06-21		0.1	10	9	16.47	7.64	166	0.076	1.1	7.41	78.3	0.05
BORÁ 1	CB1	2016-06-21		0.11	11	10	16.47	7.63	164	0.076	1.1	7.39	78	0.05
BORÁ 1	CB1	2016-07-19		0	0	1	21.22	7.47	174	0.037	0.5	7.31	84.5	0.024
BORÁ 1	CB1	2016-07-19		0.1	10	2	21.23	7.46	174	0.037	0.5	7.3	84.4	0.024
BORÁ 1	CB1	2016-07-19		0.2	20	3	21.24	7.47	174	0.037	0.5	7.27	84.1	0.024
BORÁ 1	CB1	2016-07-19		0.3	30	4	21.24	7.48	174	0.037	0.4	7.23	83.7	0.024
BORÁ 1	CB1	2016-07-19		0.4	40	5	21.24	7.5	173	0.037	0.6	7.23	83.6	0.024
BORÁ 1	CB1	2016-07-19		0.5	50	6	21.26	7.52	172	0.036	0.6	7.22	83.5	0.024
BORÁ 1	CB1	2016-07-19		0.6	60	7	21.26	7.52	172	0.036	0.5	7.2	83.3	0.024
BORÁ 1	CB1	2016-07-19		0.7	70	8	21.27	7.52	172	0.036	0.5	7.2	83.3	0.024
BORÁ 1	CB1	2016-07-19		0.8	80	9	21.27	7.5	173	0.036	0.5	7.18	83.1	0.024
BORÁ 1	CB1	2016-07-19		0.9	90	10	21.27	7.51	173	0.036	0.5	7.15	82.7	0.024
BORÁ 1	CB1	2016-08-16		0.8	80	1	19.33	7.73	188	0.04	0	6.01	67.1	0.026
BORÁ 1	CB1	2016-08-16		0.9	90	2	19.33	7.73	187	0.04	0	5.99	66.9	0.026
BORÁ 1	CB1	2016-08-16		0.1	10	3	19.44	7.74	187	0.04	0	5.98	67	0.026
BORÁ 1	CB1	2016-08-16		0.11	11	4	19.5	7.74	187	0.04	0	5.78	64.7	0.026
BORÁ 1	CB1	2016-08-16		0.12	12	5	19.45	7.75	188	0.04	0	5.63	63	0.026
BORÁ 1	CB1	2016-08-16		0.13	13	6	19.48	7.75	188	0.04	0	5.69	63.7	0.026
BORÁ 1	CB1	2016-08-16		0.14	14	7	19.51	7.75	188	0.04	0	5.71	64	0.026
BORÁ 1	CB1	2016-08-16		0.15	15	8	19.46	7.75	188	0.04	0	5.72	64	0.026
BORÁ 1	CB1	2016-08-16		0.16	16	9	19.47	7.76	188	0.04	0	5.75	64.4	0.026
BORÁ 1	CB1	2016-08-16		0.17	17	10	19.51	7.76	188	0.04	0	5.72	64.1	0.026
BORÁ 1	CB1	2016-09-20		0.1	10	1	19.7	7.76	72	0.017	0	6.98	78.5	0.011
BORÁ 1	CB1	2016-09-20		0.2	20	2	19.69	7.68	73	0.016	0	6.61	74.4	0.011
BORÁ 1	CB1	2016-09-20		0.3	30	3	19.68	7.63	73	0.016	0	6.34	71.2	0.01
BORÁ 1	CB1	2016-09-20		0.4	40	4	19.67	7.56	73	0.016	0	6.14	69	0.01
BORÁ 1	CB1	2016-09-20		0.5	50	5	19.66	7.51	73	0.016	0	6.01	67.5	0.01
BORÁ 1	CB1	2016-09-20		0.6	60	6	19.66	7.45	74	0.016	0	5.94	66.7	0.01
BORÁ 1	CB1	2016-09-20		0.7	70	7	19.66	7.39	74	0.016	0	5.86	65.8	0.01
BORÁ 1	CB1	2016-09-20		0.8	80	8	19.65	7.34	74	0.016	0	5.83	65.5	0.01
BORÁ 1	CB1	2016-09-20		0.9	90	9	19.64	7.29	74	0.015	0	5.77	64.8	0.01
BORÁ 1	CB1	2016-09-20		0.1	10	10	19.63	7.25	73	0.015	0	5.68	63.8	0.01
BORÁ 1	CB1	2016-10-18		3.7	370	1	19.72	7.83	71	0.017	0	7.6	85.4	0.011
BORÁ 1	CB1	2016-10-18		3.8	380	2	19.63	7.22	73	0.015	0	5.68	63.8	0.01
BORÁ 1	CB1	2016-10-18		3.9	390	3	19.63	7.17	74	0.015	0	5.66	63.5	0.009
BORÁ 1	CB1	2016-10-18		3.1	310	4	19.63	7.11	75	0.015	0	5.6	62.9	0.009
BORÁ 1	CB1	2016-10-18		3.11	311	5	19.62	7.07	75	0.014	0	5.58	62.7	0.009
BORÁ 1	CB1	2016-10-18		3.12	312	6	19.62	7.04	75	0.014	0	5.56	62.5	0.009
BORÁ 1	CB1	2016-10-18		3.13	313	7	19.63	7.04	74	0.014	0	5.54	62.2	0.009
BORÁ 1	CB1	2016-10-18		3.14	314	8	19.63	7.02	74	0.014	0	5.49	61.7	0.009
BORÁ 1	CB1	2016-10-18		3.15	315	9	19.62	6.98	74	0.014	0	5.48	61.6	0.009
BORÁ 1	CB1	2016-10-18		3.16	316	10	19.62	6.95	75	0.014	0	5.45	61.1	0.009
BORÁ 1	CB1	2016-11-15		1.9	190	1	21.21	8.08	10	0.046	5.8	6.32	74.3	0.03
BORÁ 1	CB1	2016-11-15		1.1	110	2	21.21	8.06	9	0.046	4.9	6.31	74.3	0.03
BORÁ 1	CB1	2016-11-15		1.11	111	3	21.2	8.05	9	0.046	4.8	6.32	74.3	0.03
BORÁ 1	CB1	2016-11-15		1.12	112	4	21.19	8.04	9	0.046	4.3	6.4	75.3	0.03
BORÁ 1	CB1	2016-11-15		1.13	113	5	21.19	8.01	10	0.046	5	6.55	77.1	0.03
BORÁ 1	CB1	2016-11-15		1.14	114	6	21.18	8	10	0.046	3.8	6.63	78	0.03
BORÁ 1	CB1	2016-11-15		1.15	115	7	21.17	7.99	11	0.046	2.2	6.59	77.5	0.03
BORÁ 1	CB1	2016-11-15		1.16	116	8	21.18	7.99	12	0.046	1.7	6.28	73.8	0.03
BORÁ 1	CB1	2016-11-15		1.17	117	9	21.17	7.99	13	0.046	1.8	6.15	72.3	0.03
BORÁ 1	CB1	2016-11-15		1.18	118	10	21.17	7.99	15	0.046	1.7	6.16	72.4	0.03
BORÁ 1	CB1	2016-12-20		2.3	230	1	21.52	7.95	145	0.082	0.2	7.74	89.9	0.053
BORÁ 1	CB1	2016-12-20		2.4	240	2	21.5	7.94	145	0.082	0.2	7.71	89.6	0.054
BORÁ 1	CB1	2016-12-20		2.5	250	3	21.49	7.94	145	0.082	0.1	7.66	89	0.053
BORÁ 1	CB1	2016-12-20		2.6	260	4	21.5	7.93	145	0.082	0.3	7.63	88.6	0.053
BORÁ 1	CB1	2016-12-20		2.7	270	5	21.49	7.93	146	0.082	0.3	7.58	88.1	0.053
BORÁ 1	CB1	2016-12-20		2.8	280	6	21.49	7.93	145	0.082	0.2	7.44	86.5	0.053
BORÁ 1	CB1	2016-12-20		2.9	290	7	21.49	7.92	145	0.082	0.3	7.46	86.6	0.053
BORÁ 1	CB1	2016-12-20		2.1	210	8	21.48	7.92	145	0.082	0.1	7.46	86.7	0.053
BORÁ 1	CB1	2016-12-20		2.11	211	9	21.6	7.98	152	0.073	0.9	6.62	78.4	0.054
BORÁ 1	CB1	2016-12-20		2.12	212	10	21.6	7.97	148	0.073	0.8	6.58	77.9	0.054
BORÁ 1	CB1	2017-01-17		10.9	1090	1	22.08	7.89	166	0.045	0	7.82	91.8	0.029
BORÁ 1	CB1	2017-01-17		10.1	1010	2	22.1	7.91	165	0.044	0	8.02	94.1	0.029
BORÁ 1	CB1	2017-01-17		10.11	1011	3	22.1	7.93	165	0.044	0	8.08	94.9	0.029
BORÁ 1	CB1	2017-01-17		10.12	1012	4	22.12	7.93	165	0.044	0	7.96	93.5	0.028
BORÁ 1	CB1	2017-01-17		10.13	1013	5	22.12	7.93	166	0.044	0.1	8.04	94.4	0.028
BORÁ 1	CB1	2017-01-17		10.14	1014	6	22.12	7.92	167	0.043	0.1	8	93.9	0.028
BORÁ 1	CB1	2017-01-17		10.15	1015	7	22.13	7.9	168	0.043	0.1	7.97	93.6	0.028
BORÁ 1	CB1	2017-01-17		10.16	1016	8	22.15	7.91	169	0.043	0	8.03	94.4	0.028
BORÁ 1	CB1	2017-01-17		10.17	1017	9	22.16	7.92	169	0.043	0.1	8.08	94.9	0.028
BORÁ 1	CB1	2017-01-17		10.18	1018	10	22.16	7.9	170	0.043	0	7.94	93.3	0.028
BORÁ 2	CB2	2016-01-19		2	200	1	23.4	7.02	166	0.034	33.7	8.51	102.2	0.022
BORÁ 2	CB2	2016-01-19		2.1	210	2	23.39	7.07	140	0.034	33.4	8.38	100.6	0.022
BORÁ 2	CB2	2016-01-19		2.2	220	3	23.4	7.07	123	0.034	34.4	8.25	99	0.022
BORÁ 2	CB2	2016-01-19		2.3	230	4	23.38	7.08	114	0.034	35.9	8.17	98.1	0.022
BORÁ 2	CB2	2016-01-19		2.4	240	5	23.36	7.07	111	0.034	32.7	8.15	97.8	0.022
BORÁ 2	CB2	2016-01-19		2.5	250	6	23.35	7.1	105	0.034	35.4	8.14	97.6	0.022
BORÁ 2	CB2	2016-01-19		2.6	260	7	23.33	7.09	104	0.034	39.6	8.05	96.5	0.022
BORÁ 2	CB2	2016-01-19		2.7	270	8	23.33	7.13	100	0.034	38.7	8.02	96.2	0.022
BORÁ 2	CB2	2016-01-19		2.8	280	9	23.32	7.18	97	0.034	35.3	7.95	95.3	0.022
BORÁ 2	CB2	2016-01-19		2.9	290	10	23.32	7.18	98	0.034	32.7	7.87	94.4	0.022
BORÁ 2	CB2	2016-02-16		5.9	590	1	23.11	7.23	66	0.06	36.6	8.29	99	0.039
BORÁ 2	CB2	2016-02-16		5.1	510	2	23.09	7.23	67	0.06	21.2	8.01	95.7	0.039
BORÁ 2	CB2	2016-02-16		5.11	511	3	23.09	7.23	67	0.06	26.3	7.7	92	0.039
BORÁ 2	CB2	2016-02-16		5.12	512	4	23.08	7.23	67	0.06	21.5	7.49	89.4	0.039
BORÁ 2	CB2	2016-02-16		5.13	513	5	23.07	7.23	66	0.06	18.4	7.36	87.9	0.039
BORÁ 2	CB2	2016-02-16		5.14	514	6	23.05	7.23	65	0.06	17.8	7.24	86.4	0.039
BORÁ 2	CB2	2016-02-16		5.15	515	7	23.04	7.23	65	0.06	18.3	7.17	85.5	0.039
BORÁ 2	CB2	2016-02-16		5.16	516	8	23.02	7.23	65	0.06	18.1	7.02	83.8	0.039
BORÁ 2	CB2	2016-02-16		5.17	517	9	23	7.23	66	0.06	17.9	7.02	83.7	0.039
BORÁ 2	CB2	2016-02-16		5.18	518	10	23	7.23	67	0.06	17.8	6.89	82.2	0.039
BORÁ 2	CB2	2016-03-15		4	400	1	23.24	7.12	127	0.046	47.8	8.33	99.8	0.03
BORÁ 2	CB2	2016-03-15		4.1	410	2	23.23	7.11	121	0.046	48.9	8.05	96.3	0.03
BORÁ 2	CB2	2016-03-15		4.2	420	3	23.21	7.12	112	0.046	50.5	7.76	92.9	0.03
BORÁ 2	CB2	2016-03-15		4.3	430	4	23.2	7.14	106	0.046	46	7.57	90.5	0.03
BORÁ 2	CB2	2016-03-15		4.4	440	5	23.18	7.17	100	0.046	49	7.42	88.7	0.03
BORÁ 2	CB2	2016-03-15		4.5	450	6	23.17	7.16	97	0.046	50.1	7.32	87.6	0.03
BORÁ 2	CB2	2016-03-15		4.6	460	7	23.19	7.11	98	0.046	47.6	7.23	86.5	0.03
BORÁ 2	CB2	2016-03-15		4.7	470	8	23.19	7.08	97	0.046	50.9	7.16	85.6	0.03
BORÁ 2	CB2	2016-03-15		4.8	480	9	23.18	7.07	97	0.046	50.3	7.1	85	0.03
BORÁ 2	CB2	2016-03-15		4.9	490	10	23.18	7.06	97	0.045	45.9	6.94	83	0.03
BORÁ 2	CB2	2016-04-19		2.4	240	1	23.92	7.04	93	0	135	8.76	106.1	0
BORÁ 2	CB2	2016-04-19		2.5	250	2	23.94	7	93	0	135	8.75	106	0
BORÁ 2	CB2	2016-04-19		2.6	260	3	23.95	7	93	0	135	8.74	105.9	0
BORÁ 2	CB2	2016-04-19		2.7	270	4	23.97	6.97	93	0	135	8.72	105.7	0
BORÁ 2	CB2	2016-04-19		2.8	280	5	23.98	6.94	93	0	135	8.71	105.6	0
BORÁ 2	CB2	2016-04-19		2.9	290	6	23.99	6.97	93	0	135	8.7	105.5	0
BORÁ 2	CB2	2016-04-19		2.1	210	7	24	6.97	93	0	135	8.69	105.3	0
BORÁ 2	CB2	2016-04-19		2.11	211	8	24.02	6.95	93	0	135	8.67	105.2	0
BORÁ 2	CB2	2016-04-19		2.12	212	9	24.04	6.93	93	0	135	8.66	105	0
BORÁ 2	CB2	2016-04-19		2.13	213	10	24.05	6.82	93	0	135	8.64	104.9	0
BORÁ 2	CB2	2016-05-17		0.5	50	1	18.76	7.76	208	0.081	0.3	9.55	105.5	0.053
BORÁ 2	CB2	2016-05-17		0.6	60	2	18.75	7.75	207	0.081	0.5	9.47	104.6	0.053
BORÁ 2	CB2	2016-05-17		0.7	70	3	18.75	7.75	206	0.081	0.4	9.5	104.9	0.053
BORÁ 2	CB2	2016-05-17		0.8	80	4	18.75	7.75	204	0.081	0.3	9.47	104.6	0.053
BORÁ 2	CB2	2016-05-17		0.9	90	5	18.75	7.74	203	0.081	0.4	9.38	103.6	0.053
BORÁ 2	CB2	2016-05-17		0.1	10	6	18.75	7.73	203	0.081	0.2	9.27	102.4	0.053
BORÁ 2	CB2	2016-05-17		0.11	11	7	18.76	7.73	201	0.081	0.4	9.19	101.6	0.053
BORÁ 2	CB2	2016-05-17		0.12	12	8	18.75	7.73	200	0.081	0.4	9.14	101	0.053
BORÁ 2	CB2	2016-05-17		0.13	13	9	18.75	7.73	199	0.081	0.4	9.13	100.9	0.053
BORÁ 2	CB2	2016-05-17		0.14	14	10	18.75	7.73	198	0.081	0.4	9.09	100.4	0.053
BORÁ 2	CB2	2016-06-21		0.2	20	1	17.11	7.57	215	0.06	1.9	7.42	79.3	0.039
BORÁ 2	CB2	2016-06-21		0.3	30	2	17.09	7.58	215	0.06	1.8	7.34	78.5	0.039
BORÁ 2	CB2	2016-06-21		0.4	40	3	17.07	7.57	215	0.06	1.7	7.26	77.7	0.039
BORÁ 2	CB2	2016-06-21		0.5	50	4	17.06	7.57	216	0.06	1.8	7.27	77.7	0.039
BORÁ 2	CB2	2016-06-21		0.6	60	5	17.06	7.57	216	0.06	1.9	7.23	77.2	0.039
BORÁ 2	CB2	2016-06-21		0.7	70	6	17.05	7.56	216	0.06	1.8	7.16	76.5	0.039
BORÁ 2	CB2	2016-06-21		0.8	80	7	17.04	7.56	217	0.06	2	7.08	75.7	0.039
BORÁ 2	CB2	2016-06-21		0.9	90	8	17.04	7.55	217	0.06	1.8	7.19	76.8	0.039
BORÁ 2	CB2	2016-06-21		0.1	10	9	17.04	7.54	218	0.06	1.8	7.28	77.7	0.039
BORÁ 2	CB2	2016-06-21		0.11	11	10	17.04	7.54	218	0.06	1.8	7.19	76.8	0.039
BORÁ 2	CB2	2016-07-19		0	0	1	17.33	7.87	172	0.076	0.8	8.39	90.1	0.05
BORÁ 2	CB2	2016-07-19		0.1	10	2	17.32	7.87	171	0.076	0.7	8.23	88.5	0.05
BORÁ 2	CB2	2016-07-19		0.2	20	3	17.32	7.87	170	0.076	0.8	8.12	87.2	0.049
BORÁ 2	CB2	2016-07-19		0.3	30	4	17.32	7.87	170	0.076	0.9	8.02	86.2	0.049
BORÁ 2	CB2	2016-07-19		0.4	40	5	17.32	7.86	169	0.076	0.9	7.92	85.1	0.049
BORÁ 2	CB2	2016-07-19		0.5	50	6	17.32	7.86	169	0.076	0.9	7.86	84.5	0.05
BORÁ 2	CB2	2016-07-19		0.6	60	7	17.32	7.85	169	0.076	0.9	7.81	83.9	0.05
BORÁ 2	CB2	2016-07-19		0.7	70	8	17.32	7.85	168	0.076	0.8	7.76	83.3	0.05
BORÁ 2	CB2	2016-07-19		0.8	80	9	17.31	7.84	168	0.076	0.8	7.73	83	0.05
BORÁ 2	CB2	2016-07-19		0.9	90	10	17.32	7.83	168	0.076	0.7	7.69	82.6	0.05
BORÁ 2	CB2	2016-08-16		0.8	80	1	16.11	8.08	189	0.076	0.6	8.01	83.9	0.049
BORÁ 2	CB2	2016-08-16		0.9	90	2	16.11	8.09	189	0.076	0.6	7.88	82.6	0.049
BORÁ 2	CB2	2016-08-16		0.1	10	3	16.1	8.09	188	0.076	0.6	7.78	81.5	0.049
BORÁ 2	CB2	2016-08-16		0.11	11	4	16.1	8.09	188	0.076	0.6	7.69	80.6	0.049
BORÁ 2	CB2	2016-08-16		0.12	12	5	16.11	8.09	187	0.076	0.5	7.62	79.8	0.049
BORÁ 2	CB2	2016-08-16		0.13	13	6	16.1	8.1	187	0.076	0.4	7.56	79.2	0.049
BORÁ 2	CB2	2016-08-16		0.14	14	7	16.11	8.1	186	0.076	0.5	7.49	78.5	0.049
BORÁ 2	CB2	2016-08-16		0.15	15	8	16.1	8.1	186	0.076	0.7	7.45	78.1	0.049
BORÁ 2	CB2	2016-08-16		0.16	16	9	16.11	8.1	186	0.076	0.5	7.42	77.8	0.049
BORÁ 2	CB2	2016-08-16		0.17	17	10	16.1	8.09	185	0.076	0.5	7.45	78.1	0.049
BORÁ 2	CB2	2016-09-20		0.1	10	1	19.56	7.31	118	0.143	89.1	5.12	57.5	0.093
BORÁ 2	CB2	2016-09-20		0.2	20	2	19.46	7.28	113	0.143	86.6	4.85	54.2	0.093
BORÁ 2	CB2	2016-09-20		0.3	30	3	19.44	7.26	108	0.143	83.3	4.64	52	0.093
BORÁ 2	CB2	2016-09-20		0.4	40	4	19.44	7.25	105	0.143	86.4	4.58	51.2	0.093
BORÁ 2	CB2	2016-09-20		0.5	50	5	19.35	7.24	101	0.142	86.3	4.36	48.7	0.093
BORÁ 2	CB2	2016-09-20		0.6	60	6	19.27	7.25	96	0.143	79.6	4.66	52	0.093
BORÁ 2	CB2	2016-09-20		0.7	70	7	19.31	7.27	93	0.143	78	4.98	55.6	0.093
BORÁ 2	CB2	2016-09-20		0.8	80	8	19.34	7.28	91	0.143	86.6	4.87	54.4	0.093
BORÁ 2	CB2	2016-09-20		0.9	90	9	19.31	7.29	90	0.142	87.1	4.79	53.5	0.093
BORÁ 2	CB2	2016-09-20		0.1	10	10	18.46	7.14	-90	0.164	39.9	2.21	24.3	0.107
BORÁ 2	CB2	2016-10-18		3.7	370	1	19.33	7.05	-42	0.145	17.6	8.12	90.7	0.094
BORÁ 2	CB2	2016-10-18		3.8	380	2	19.25	7.07	-53	0.148	17	8.02	89.4	0.096
BORÁ 2	CB2	2016-10-18		3.9	390	3	19.22	7.08	-62	0.151	16.4	7.91	88.2	0.098
BORÁ 2	CB2	2016-10-18		3.1	310	4	19.24	7.1	-69	0.152	15.5	7.8	87	0.099
BORÁ 2	CB2	2016-10-18		3.11	311	5	19.21	7.11	-74	0.153	14.8	7.71	85.9	0.099
BORÁ 2	CB2	2016-10-18		3.12	312	6	19.2	7.12	-78	0.154	14.2	7.63	85	0.1
BORÁ 2	CB2	2016-10-18		3.13	313	7	19.23	7.13	-81	0.155	15.1	7.54	84	0.101
BORÁ 2	CB2	2016-10-18		3.14	314	8	19.03	7.13	-84	0.157	44.6	7.54	83.5	0.102
BORÁ 2	CB2	2016-10-18		3.15	315	9	18.49	7.13	-86	0.161	62.2	5.97	65.5	0.104
BORÁ 2	CB2	2016-10-18		3.16	316	10	18.37	7.13	-89	0.164	29.1	3.18	34.9	0.106
BORÁ 2	CB2	2016-11-15		1.9	190	1	19.87	7.51	29	0.079	1.6	5.83	65.8	0.052
BORÁ 2	CB2	2016-11-15		1.1	110	2	19.86	7.52	29	0.079	1.7	5.72	64.5	0.052
BORÁ 2	CB2	2016-11-15		1.11	111	3	19.87	7.54	30	0.079	1.4	5.71	64.4	0.052
BORÁ 2	CB2	2016-11-15		1.12	112	4	19.87	7.54	30	0.079	2.3	5.65	63.8	0.052
BORÁ 2	CB2	2016-11-15		1.13	113	5	19.87	7.55	31	0.073	21.5	5.7	64.3	0.048
BORÁ 2	CB2	2016-11-15		1.14	114	6	19.86	7.55	32	0.075	8.2	6.42	72.5	0.048
BORÁ 2	CB2	2016-11-15		1.15	115	7	19.87	7.56	32	0.079	3.7	7.13	80.5	0.051
BORÁ 2	CB2	2016-11-15		1.16	116	8	19.87	7.56	33	0.079	2.2	7.21	81.4	0.051
BORÁ 2	CB2	2016-11-15		1.17	117	9	19.87	7.56	34	0.079	1.6	7.2	81.3	0.051
BORÁ 2	CB2	2016-11-15		1.18	118	10	19.87	7.57	35	0.079	1.7	7.18	81	0.052
BORÁ 2	CB2	2016-12-20		2.3	230	1	21.86	7.83	157	0.052	0.2	8.81	103	0.034
BORÁ 2	CB2	2016-12-20		2.4	240	2	21.89	7.82	159	0.052	0.1	8.64	101.1	0.034
BORÁ 2	CB2	2016-12-20		2.5	250	3	21.91	7.82	161	0.05	0.1	8.38	98	0.033
BORÁ 2	CB2	2016-12-20		2.6	260	4	21.95	7.81	163	0.049	0.1	8.21	96.1	0.032
BORÁ 2	CB2	2016-12-20		2.7	270	5	21.98	7.8	164	0.048	0.1	8.31	97.4	0.031
BORÁ 2	CB2	2016-12-20		2.8	280	6	22	7.82	164	0.049	0.1	8.22	96.3	0.032
BORÁ 2	CB2	2016-12-20		2.9	290	7	22.01	7.84	164	0.048	0.1	8.12	95.2	0.031
BORÁ 2	CB2	2016-12-20		2.1	210	8	22.03	7.84	165	0.048	0.1	8.19	96.1	0.031
BORÁ 2	CB2	2016-12-20		2.11	211	9	22.04	7.86	165	0.049	0.1	8.17	95.8	0.032
BORÁ 2	CB2	2016-12-20		2.12	212	10	22.04	7.88	164	0.047	0.1	8.15	95.6	0.031
BORÁ 2	CB2	2017-01-17		10.9	1090	1	22.16	7.9	171	0.043	0	7.87	92.5	0.028
BORÁ 2	CB2	2017-01-17		10.1	1010	2	20.46	8.12	182	0.066	5.3	9.44	107.7	0.042
BORÁ 2	CB2	2017-01-17		10.11	1011	3	20.45	8.14	181	0.074	0.6	9.21	105	0.048
BORÁ 2	CB2	2017-01-17		10.12	1012	4	20.44	8.15	180	0.074	0.5	9.05	103.1	0.048
BORÁ 2	CB2	2017-01-17		10.13	1013	5	20.44	8.16	180	0.074	0.5	8.94	102	0.048
BORÁ 2	CB2	2017-01-17		10.14	1014	6	20.44	8.16	179	0.074	0.5	8.85	100.9	0.048
BORÁ 2	CB2	2017-01-17		10.15	1015	7	20.44	8.17	179	0.074	0.4	8.79	100.2	0.048
BORÁ 2	CB2	2017-01-17		10.16	1016	8	20.43	8.17	179	0.074	0.5	8.74	99.7	0.048
BORÁ 2	CB2	2017-01-17		10.17	1017	9	20.44	8.17	179	0.074	0.6	8.68	99	0.048
BORÁ 2	CB2	2017-01-17		10.18	1018	10	20.44	8.18	179	0.074	0.5	8.64	98.5	0.048
LAJEADO	CLj	2016-01-19		2	200	1	24.67	6.76	272	0.031	10	9.19	112.7	0.02
LAJEADO	CLj	2016-01-19		2.1	210	2	24.65	6.75	270	0.031	9.9	9.05	110.9	0.02
LAJEADO	CLj	2016-01-19		2.2	220	3	24.61	6.74	266	0.031	10.1	8.98	110	0.02
LAJEADO	CLj	2016-01-19		2.3	230	4	24.57	6.68	267	0.031	9.7	9.01	110.2	0.02
LAJEADO	CLj	2016-01-19		2.4	240	5	24.56	6.65	266	0.031	9.9	9.09	111.3	0.02
LAJEADO	CLj	2016-01-19		2.5	250	6	24.55	6.6	268	0.031	10.5	9.11	111.5	0.02
LAJEADO	CLj	2016-01-19		2.6	260	7	24.54	6.47	271	0.031	10	9.25	113.2	0.02
LAJEADO	CLj	2016-01-19		2.7	270	8	24.54	6.47	268	0.031	10.3	9.27	113.4	0.02
LAJEADO	CLj	2016-01-19		2.8	280	9	24.54	6.54	262	0.031	10	9.21	112.7	0.02
LAJEADO	CLj	2016-01-19		2.9	290	10	24.54	6.53	261	0.031	9.9	9.15	111.9	0.02
LAJEADO	CLj	2016-02-16		5.9	590	1	24.83	6.34	282	0.033	7.5	7.22	88.7	0.021
LAJEADO	CLj	2016-02-16		5.1	510	2	24.79	6.35	281	0.033	6.6	7.05	86.6	0.021
LAJEADO	CLj	2016-02-16		5.11	511	3	24.82	6.35	279	0.033	6.4	6.61	81.2	0.021
LAJEADO	CLj	2016-02-16		5.12	512	4	24.78	6.38	276	0.033	5.3	6.44	79.1	0.021
LAJEADO	CLj	2016-02-16		5.13	513	5	24.73	6.4	273	0.033	5.4	6.44	79	0.021
LAJEADO	CLj	2016-02-16		5.14	514	6	24.75	6.42	270	0.033	4.8	6.41	78.7	0.021
LAJEADO	CLj	2016-02-16		5.15	515	7	24.77	6.41	270	0.033	5.2	6.27	77	0.021
LAJEADO	CLj	2016-02-16		5.16	516	8	24.76	6.42	268	0.033	4.8	6.11	74.9	0.021
LAJEADO	CLj	2016-02-16		5.17	517	9	24.73	6.41	267	0.033	4.7	5.91	72.5	0.021
LAJEADO	CLj	2016-02-16		5.18	518	10	24.68	6.41	264	0.033	4.6	5.8	71.1	0.021
LAJEADO	CLj	2016-03-15		4	400	1	24.95	6.75	244	0.034	16.6	7.83	96.4	0.022
LAJEADO	CLj	2016-03-15		4.1	410	2	24.9	6.74	241	0.034	16.6	7.47	91.9	0.022
LAJEADO	CLj	2016-03-15		4.2	420	3	24.86	6.75	238	0.033	16.4	7.05	86.7	0.022
LAJEADO	CLj	2016-03-15		4.3	430	4	24.86	6.75	236	0.033	16.6	6.74	82.9	0.022
LAJEADO	CLj	2016-03-15		4.4	440	5	24.84	6.74	234	0.033	17.1	6.52	80.2	0.022
LAJEADO	CLj	2016-03-15		4.5	450	6	24.83	6.73	232	0.033	16.7	6.35	78.1	0.022
LAJEADO	CLj	2016-03-15		4.6	460	7	24.79	6.72	230	0.033	17	6.21	76.3	0.022
LAJEADO	CLj	2016-03-15		4.7	470	8	24.79	6.5	227	0.024	26.9	6.11	75.1	0.016
LAJEADO	CLj	2016-03-15		4.8	480	9	24.7	6.44	125	0.029	23.4	6.06	74.3	0.018
LAJEADO	CLj	2016-03-15		4.9	490	10	24.69	6.44	125	0.026	24.6	6.04	74	0.016
LAJEADO	CLj	2016-04-19		2.4	240	1	24.12	6.88	93	0	135	8.57	104.2	0
LAJEADO	CLj	2016-04-19		2.5	250	2	24.14	6.86	93	0	135	8.56	104	0
LAJEADO	CLj	2016-04-19		2.6	260	3	24.15	6.83	93	0	135	8.54	103.8	0
LAJEADO	CLj	2016-04-19		2.7	270	4	24.16	6.83	93	0	135	8.52	103.6	0
LAJEADO	CLj	2016-04-19		2.8	280	5	24.18	6.84	93	0	135	8.51	103.5	0
LAJEADO	CLj	2016-04-19		2.9	290	6	24.19	6.81	92	0	135	8.5	103.3	0
LAJEADO	CLj	2016-04-19		2.1	210	7	24.2	6.8	92	0	135	8.48	103.2	0
LAJEADO	CLj	2016-04-19		2.11	211	8	24.22	6.77	92	0	135	8.47	103.1	0
LAJEADO	CLj	2016-04-19		2.12	212	9	24.23	6.74	92	0	135	8.46	103	0
LAJEADO	CLj	2016-04-19		2.13	213	10	24.24	6.73	92	0	135	8.45	102.9	0
LAJEADO	CLj	2016-05-17		0.5	50	1	21.3	7.53	209	0.035	0.5	7.16	83	0.023
LAJEADO	CLj	2016-05-17		0.6	60	2	21.31	7.53	209	0.035	0.4	7.14	82.7	0.022
LAJEADO	CLj	2016-05-17		0.7	70	3	21.3	7.53	209	0.035	0.5	7.31	84.6	0.022
LAJEADO	CLj	2016-05-17		0.8	80	4	21.3	7.52	209	0.035	0.5	7.45	86.2	0.022
LAJEADO	CLj	2016-05-17		0.9	90	5	18.76	7.68	221	0.081	0.5	10.77	119	0.053
LAJEADO	CLj	2016-05-17		0.1	10	6	18.75	7.67	220	0.081	0.6	10.42	115.1	0.053
LAJEADO	CLj	2016-05-17		0.11	11	7	18.75	7.71	217	0.081	0.3	10.15	112.2	0.053
LAJEADO	CLj	2016-05-17		0.12	12	8	18.75	7.75	214	0.081	0.3	9.99	110.4	0.053
LAJEADO	CLj	2016-05-17		0.13	13	9	18.75	7.74	213	0.081	0.3	9.91	109.5	0.053
LAJEADO	CLj	2016-05-17		0.14	14	10	18.75	7.75	211	0.081	0.2	9.84	108.7	0.053
LAJEADO	CLj	2016-06-21		0.2	20	1	16.61	7.66	119	0.037	2.1	7.02	74.3	0.024
LAJEADO	CLj	2016-06-21		0.3	30	2	16.6	7.66	117	0.037	2.3	6.98	73.9	0.024
LAJEADO	CLj	2016-06-21		0.4	40	3	16.61	7.66	116	0.037	2.3	6.98	73.9	0.024
LAJEADO	CLj	2016-06-21		0.5	50	4	16.6	7.65	115	0.037	2.3	6.98	73.9	0.024
LAJEADO	CLj	2016-06-21		0.6	60	5	16.6	7.65	114	0.037	2.5	6.97	73.8	0.024
LAJEADO	CLj	2016-06-21		0.7	70	6	16.6	7.65	113	0.037	2.4	6.96	73.7	0.024
LAJEADO	CLj	2016-06-21		0.8	80	7	16.61	7.65	112	0.037	2.3	6.92	73.3	0.024
LAJEADO	CLj	2016-06-21		0.9	90	8	16.61	7.65	111	0.037	2.4	6.88	72.9	0.024
LAJEADO	CLj	2016-06-21		0.1	10	9	16.6	7.65	111	0.037	2.2	6.89	73	0.024
LAJEADO	CLj	2016-06-21		0.11	11	10	16.61	7.65	110	0.037	2.2	6.89	73	0.024
LAJEADO	CLj	2016-07-19		0	0	1	16.46	7.66	225	0.067	1.6	9.96	105.1	0.044
LAJEADO	CLj	2016-07-19		0.1	10	2	16.45	7.68	224	0.067	1.6	9.59	101.2	0.044
LAJEADO	CLj	2016-07-19		0.2	20	3	16.44	7.69	223	0.067	1.6	9.23	97.4	0.044
LAJEADO	CLj	2016-07-19		0.3	30	4	16.44	7.71	223	0.067	1.5	8.95	94.4	0.044
LAJEADO	CLj	2016-07-19		0.4	40	5	16.43	7.73	222	0.067	1.5	8.72	92.1	0.044
LAJEADO	CLj	2016-07-19		0.5	50	6	16.42	7.75	221	0.067	1.7	8.52	89.9	0.044
LAJEADO	CLj	2016-07-19		0.6	60	7	16.42	7.76	220	0.067	1.5	8.34	88	0.044
LAJEADO	CLj	2016-07-19		0.7	70	8	16.42	7.78	220	0.067	1.4	8.21	86.6	0.044
LAJEADO	CLj	2016-07-19		0.8	80	9	16.41	7.8	219	0.067	1.4	8.08	85.2	0.044
LAJEADO	CLj	2016-07-19		0.9	90	10	16.41	7.82	217	0.067	1.4	8.01	84.4	0.044
LAJEADO	CLj	2016-08-16		0.8	80	1	18.18	7.67	195	0.041	14.6	7.47	81.7	0.027
LAJEADO	CLj	2016-08-16		0.9	90	2	18.26	7.63	188	0.041	11.9	6.78	74.2	0.027
LAJEADO	CLj	2016-08-16		0.1	10	3	18.32	7.59	183	0.041	11.7	6.32	69.3	0.027
LAJEADO	CLj	2016-08-16		0.11	11	4	18.37	7.55	178	0.041	13.4	6.05	66.4	0.026
LAJEADO	CLj	2016-08-16		0.12	12	5	18.43	7.51	174	0.041	15.9	5.83	64	0.026
LAJEADO	CLj	2016-08-16		0.13	13	6	18.45	7.49	169	0.041	14.4	5.66	62.2	0.026
LAJEADO	CLj	2016-08-16		0.14	14	7	18.47	7.46	162	0.041	13.6	5.51	60.6	0.026
LAJEADO	CLj	2016-08-16		0.15	15	8	18.48	7.43	155	0.041	13.2	5.38	59.1	0.026
LAJEADO	CLj	2016-08-16		0.16	16	9	18.49	7.41	148	0.041	12.7	5.28	58	0.026
LAJEADO	CLj	2016-08-16		0.17	17	10	18.49	7.38	140	0.041	11.3	5.19	57	0.026
LAJEADO	CLj	2016-09-20		0.1	10	1	20.99	7.44	81	0.064	7.3	5.27	60.6	0.042
LAJEADO	CLj	2016-09-20		0.2	20	2	21.68	7.98	107	0.068	3.3	11.45	133.4	0.044
LAJEADO	CLj	2016-09-20		0.3	30	3	21.69	7.98	109	0.068	3.4	9.76	113.9	0.044
LAJEADO	CLj	2016-09-20		0.4	40	4	21.71	7.98	111	0.068	3.1	8.49	99	0.044
LAJEADO	CLj	2016-09-20		0.5	50	5	21.69	7.99	112	0.068	1.8	7.63	89	0.044
LAJEADO	CLj	2016-09-20		0.6	60	6	21.69	7.99	113	0.067	1.4	7.17	83.6	0.044
LAJEADO	CLj	2016-09-20		0.7	70	7	21.67	7.98	115	0.067	1.3	7.13	83.1	0.044
LAJEADO	CLj	2016-09-20		0.8	80	8	21.66	7.98	116	0.067	1.4	6.9	80.5	0.044
LAJEADO	CLj	2016-09-20		0.9	90	9	21.64	7.97	117	0.067	1.3	6.64	77.4	0.044
LAJEADO	CLj	2016-09-20		0.1	10	10	21.63	7.97	118	0.067	1.2	6.61	77	0.044
LAJEADO	CLj	2016-10-18		3.7	370	1	20.45	8.41	188	0.084	7.6	6.36	72.6	0.055
LAJEADO	CLj	2016-10-18		3.8	380	2	20.48	8.43	188	0.084	5	6.17	70.4	0.054
LAJEADO	CLj	2016-10-18		3.9	390	3	20.49	8.44	188	0.084	4.8	6.08	69.4	0.054
LAJEADO	CLj	2016-10-18		3.1	310	4	20.43	8.44	189	0.084	6	6.25	71.2	0.055
LAJEADO	CLj	2016-10-18		3.11	311	5	20.32	8.5	187	0.085	10	6.57	74.7	0.055
LAJEADO	CLj	2016-10-18		3.12	312	6	20.32	8.51	187	0.085	14.3	6.5	74	0.055
LAJEADO	CLj	2016-10-18		3.13	313	7	20.33	8.51	187	0.085	14.7	6.09	69.3	0.055
LAJEADO	CLj	2016-10-18		3.14	314	8	20.37	8.5	187	0.085	12.9	5.81	66.2	0.055
LAJEADO	CLj	2016-10-18		3.15	315	9	20.38	8.5	187	0.085	12.2	5.57	63.4	0.055
LAJEADO	CLj	2016-10-18		3.16	316	10	20.39	8.5	187	0.085	11.3	5.47	62.4	0.055
LAJEADO	CLj	2016-11-15		1.9	190	1	20.92	8.14	205	0.055	0	7.16	82.4	0.036
LAJEADO	CLj	2016-11-15		1.1	110	2	20.91	8.14	205	0.055	0	7.16	82.3	0.036
LAJEADO	CLj	2016-11-15		1.11	111	3	20.91	8.12	206	0.055	0	7.11	81.7	0.036
LAJEADO	CLj	2016-11-15		1.12	112	4	20.91	8.12	206	0.055	0	7.09	81.6	0.036
LAJEADO	CLj	2016-11-15		1.13	113	5	20.91	8.11	207	0.055	0	7.06	81.2	0.036
LAJEADO	CLj	2016-11-15		1.14	114	6	20.91	8.1	207	0.055	0	7.05	81.1	0.036
LAJEADO	CLj	2016-11-15		1.15	115	7	20.9	8.09	207	0.055	0	7.05	81	0.036
LAJEADO	CLj	2016-11-15		1.16	116	8	20.9	8.08	208	0.055	0	7.03	80.8	0.036
LAJEADO	CLj	2016-11-15		1.17	117	9	20.91	8.08	208	0.055	0	7.01	80.6	0.036
LAJEADO	CLj	2016-11-15		1.18	118	10	20.9	8.07	208	0.055	0	7.02	80.7	0.036
LAJEADO	CLj	2016-12-20		2.3	230	1	20.22	7.7	20	0.054	6	7.44	84.4	0.035
LAJEADO	CLj	2016-12-20		2.4	240	2	20.21	7.72	20	0.054	3.7	7.21	81.8	0.035
LAJEADO	CLj	2016-12-20		2.5	250	3	20.2	7.72	21	0.054	2.7	6.99	79.3	0.035
LAJEADO	CLj	2016-12-20		2.6	260	4	20.19	7.72	22	0.053	1.3	6.9	78.3	0.035
LAJEADO	CLj	2016-12-20		2.7	270	5	20.18	7.72	22	0.053	1.3	6.81	77.2	0.035
LAJEADO	CLj	2016-12-20		2.8	280	6	20.19	7.71	23	0.053	1.1	6.72	76.2	0.035
LAJEADO	CLj	2016-12-20		2.9	290	7	20.19	7.71	24	0.053	1	6.58	74.7	0.035
LAJEADO	CLj	2016-12-20		2.1	210	8	20.18	7.71	25	0.053	1.1	6.55	74.3	0.034
LAJEADO	CLj	2016-12-20		2.11	211	9	20.18	7.7	26	0.053	1	6.53	74	0.034
LAJEADO	CLj	2016-12-20		2.12	212	10	20.16	7.7	27	0.053	0.9	6.54	74.1	0.034
LAJEADO	CLj	2017-01-17		10.9	1090	1	20.99	7.57	90	0.064	2.1	5.68	65.4	0.042
LAJEADO	CLj	2017-01-17		10.1	1010	2	21	7.55	89	0.064	2.1	5.66	65.2	0.042
LAJEADO	CLj	2017-01-17		10.11	1011	3	21.01	7.54	89	0.064	2.1	5.6	64.5	0.042
LAJEADO	CLj	2017-01-17		10.12	1012	4	21.02	7.53	88	0.064	2.2	5.53	63.8	0.042
LAJEADO	CLj	2017-01-17		10.13	1013	5	21.02	7.52	87	0.064	2.3	5.48	63.2	0.042
LAJEADO	CLj	2017-01-17		10.14	1014	6	21.03	7.5	87	0.064	3.3	5.45	62.8	0.042
LAJEADO	CLj	2017-01-17		10.15	1015	7	21.03	7.49	86	0.064	3.7	5.46	62.9	0.042
LAJEADO	CLj	2017-01-17		10.16	1016	8	21.03	7.48	86	0.064	3.9	5.51	63.4	0.042
LAJEADO	CLj	2017-01-17		10.17	1017	9	21.04	7.47	85	0.064	4.4	5.49	63.3	0.042
LAJEADO	CLj	2017-01-17		10.18	1018	10	21.04	7.46	84	0.064	5.2	5.46	62.9	0.042
ALEGRIA	CA	2016-01-19		2	200	1	25.54	6.7	162	0.055	3.5	6.03	74.9	0.036
ALEGRIA	CA	2016-01-19		2.1	210	2	25.56	6.71	163	0.055	3.3	5.85	72.7	0.036
ALEGRIA	CA	2016-01-19		2.2	220	3	25.55	6.69	165	0.055	3.4	5.66	70.4	0.036
ALEGRIA	CA	2016-01-19		2.3	230	4	25.54	6.76	157	0.055	3.4	5.53	68.7	0.036
ALEGRIA	CA	2016-01-19		2.4	240	5	25.53	6.74	156	0.055	3.7	5.44	67.6	0.036
ALEGRIA	CA	2016-01-19		2.5	250	6	25.54	6.77	150	0.055	3.5	5.35	66.5	0.036
ALEGRIA	CA	2016-01-19		2.6	260	7	25.53	6.72	151	0.055	3.7	5.27	65.5	0.036
ALEGRIA	CA	2016-01-19		2.7	270	8	25.55	6.72	149	0.055	3.5	5.2	64.6	0.036
ALEGRIA	CA	2016-01-19		2.8	280	9	25.55	6.74	145	0.055	3.2	5.1	63.4	0.036
ALEGRIA	CA	2016-01-19		2.9	290	10	25.5	6.71	145	0.055	3.3	5.05	62.8	0.036
ALEGRIA	CA	2016-02-16		5.9	590	1	25.24	6.33	117	0.062	2.9	5.52	68.2	0.04
ALEGRIA	CA	2016-02-16		5.1	510	2	25.16	6.27	114	0.062	3.1	5.2	64.2	0.04
ALEGRIA	CA	2016-02-16		5.11	511	3	25.12	6.26	110	0.062	2.9	5	61.7	0.04
ALEGRIA	CA	2016-02-16		5.12	512	4	25.1	6.26	107	0.062	3	4.9	60.5	0.04
ALEGRIA	CA	2016-02-16		5.13	513	5	25.09	6.24	107	0.061	3.1	4.77	58.9	0.04
ALEGRIA	CA	2016-02-16		5.14	514	6	25.08	6.25	106	0.061	2.9	4.66	57.5	0.04
ALEGRIA	CA	2016-02-16		5.15	515	7	25.07	6.24	105	0.061	2.9	4.53	55.9	0.04
ALEGRIA	CA	2016-02-16		5.16	516	8	25.07	6.23	105	0.061	2.9	4.42	54.5	0.04
ALEGRIA	CA	2016-02-16		5.17	517	9	25.08	6.23	104	0.061	2.6	4.4	54.3	0.04
ALEGRIA	CA	2016-02-16		5.18	518	10	25.08	6.23	104	0.061	2.9	4.35	53.7	0.04
ALEGRIA	CA	2016-03-15		4	400	1	24.81	6.45	160	0.056	2.3	8.51	104.6	0.036
ALEGRIA	CA	2016-03-15		4.1	410	2	24.79	6.45	155	0.056	2.5	8.17	100.4	0.036
ALEGRIA	CA	2016-03-15		4.2	420	3	24.79	6.46	149	0.055	2.7	7.87	96.6	0.036
ALEGRIA	CA	2016-03-15		4.3	430	4	24.75	6.48	144	0.055	2.4	7.64	93.7	0.036
ALEGRIA	CA	2016-03-15		4.4	440	5	24.77	6.48	140	0.055	2.4	7.44	91.3	0.036
ALEGRIA	CA	2016-03-15		4.5	450	6	24.75	6.48	138	0.055	2.2	7.29	89.4	0.036
ALEGRIA	CA	2016-03-15		4.6	460	7	24.77	6.47	136	0.055	2.4	7.15	87.9	0.036
ALEGRIA	CA	2016-03-15		4.7	470	8	24.75	6.48	133	0.055	2.5	7.05	86.5	0.036
ALEGRIA	CA	2016-03-15		4.8	480	9	24.73	6.48	132	0.055	2.5	6.96	85.4	0.036
ALEGRIA	CA	2016-03-15		4.9	490	10	24.74	6.49	130	0.055	2.2	6.87	84.3	0.036
ALEGRIA	CA	2016-04-19		2.4	240	1	24.76	7.19	236	0.077	9.3	8.53	104.8	0.05
ALEGRIA	CA	2016-04-19		2.5	250	2	24.76	7.18	236	0.077	9.1	8.44	103.6	0.05
ALEGRIA	CA	2016-04-19		2.6	260	3	24.76	7.17	236	0.077	9.3	8.33	102.3	0.05
ALEGRIA	CA	2016-04-19		2.7	270	4	24.75	7.16	236	0.077	8.9	8.26	101.4	0.05
ALEGRIA	CA	2016-04-19		2.8	280	5	24.74	7.15	236	0.077	9.1	8.26	101.4	0.05
ALEGRIA	CA	2016-04-19		2.9	290	6	24.76	7.12	237	0.077	9.2	8.21	100.8	0.05
ALEGRIA	CA	2016-04-19		2.1	210	7	24.74	7.12	237	0.077	9.3	8.18	100.4	0.05
ALEGRIA	CA	2016-04-19		2.11	211	8	24.74	7.12	236	0.077	9.2	8.22	100.9	0.05
ALEGRIA	CA	2016-04-19		2.12	212	9	24.73	7.1	237	0.077	9.5	8.16	100.2	0.05
ALEGRIA	CA	2016-04-19		2.13	213	10	24.72	7.09	237	0.077	9.3	8.09	99.3	0.05
ALEGRIA	CA	2016-05-17		0.5	50	1	19.28	7.17	144	0.059	7.6	9.09	101.4	0.038
ALEGRIA	CA	2016-05-17		0.6	60	2	19.28	7.17	143	0.059	7.7	8.98	100.2	0.038
ALEGRIA	CA	2016-05-17		0.7	70	3	19.29	7.17	141	0.059	7.5	8.9	99.3	0.038
ALEGRIA	CA	2016-05-17		0.8	80	4	19.29	7.18	139	0.059	13.8	8.58	95.8	0.038
ALEGRIA	CA	2016-05-17		0.9	90	5	19.29	7.19	137	0.058	23	7.99	89.1	0.038
ALEGRIA	CA	2016-05-17		0.1	10	6	19.3	7.19	136	0.059	16.9	7.51	83.8	0.038
ALEGRIA	CA	2016-05-17		0.11	11	7	19.3	7.19	135	0.059	15.4	7.4	82.6	0.038
ALEGRIA	CA	2016-05-17		0.12	12	8	19.31	7.2	134	0.059	13.7	7.39	82.5	0.038
ALEGRIA	CA	2016-05-17		0.13	13	9	19.3	7.25	134	0.036	33.2	7.84	87.5	0.023
ALEGRIA	CA	2016-05-17		0.14	14	10	19.29	7.19	132	0.054	13.1	8.77	97.8	0.035
ALEGRIA	CA	2016-06-21		0.2	20	1	16.65	7.39	17	0.082	6.9	6.41	67.9	0.053
ALEGRIA	CA	2016-06-21		0.3	30	2	16.65	7.38	17	0.082	6.8	6.42	68.1	0.053
ALEGRIA	CA	2016-06-21		0.4	40	3	16.66	7.37	18	0.082	6.7	6.26	66.4	0.053
ALEGRIA	CA	2016-06-21		0.5	50	4	16.65	7.36	18	0.082	6.5	6.28	66.5	0.053
ALEGRIA	CA	2016-06-21		0.6	60	5	16.65	7.35	18	0.082	7	6.32	67	0.053
ALEGRIA	CA	2016-06-21		0.7	70	6	16.65	7.35	18	0.082	6.5	6.23	66.1	0.053
ALEGRIA	CA	2016-06-21		0.8	80	7	16.65	7.34	19	0.082	6.4	5.99	63.5	0.053
ALEGRIA	CA	2016-06-21		0.9	90	8	16.65	7.33	20	0.082	6.9	6.06	64.2	0.053
ALEGRIA	CA	2016-06-21		0.1	10	9	16.65	7.32	20	0.082	7.2	6.26	66.4	0.053
ALEGRIA	CA	2016-06-21		0.11	11	10	16.65	7.32	20	0.082	6.9	6.16	65.3	0.053
ALEGRIA	CA	2016-07-19		0	0	1	16.17	7.86	207	0.059	1.3	8.2	86	0.039
ALEGRIA	CA	2016-07-19		0.1	10	2	16.17	7.86	209	0.059	1.3	8.03	84.3	0.039
ALEGRIA	CA	2016-07-19		0.2	20	3	16.18	7.85	211	0.059	1.3	7.89	82.8	0.039
ALEGRIA	CA	2016-07-19		0.3	30	4	16.19	7.85	212	0.058	1.3	7.75	81.4	0.038
ALEGRIA	CA	2016-07-19		0.4	40	5	16.19	7.85	209	0.057	1.3	7.66	80.4	0.037
ALEGRIA	CA	2016-07-19		0.5	50	6	16.2	7.84	208	0.059	1.3	7.6	79.8	0.039
ALEGRIA	CA	2016-07-19		0.6	60	7	16.2	7.86	203	0.059	1.8	7.54	79.1	0.039
ALEGRIA	CA	2016-07-19		0.7	70	8	16.19	7.88	204	0.059	1.2	7.52	79	0.038
ALEGRIA	CA	2016-07-19		0.8	80	9	16.2	7.86	204	0.059	1	7.48	78.5	0.039
ALEGRIA	CA	2016-07-19		0.9	90	10	16.2	7.83	205	0.059	1.2	7.44	78.2	0.039
ALEGRIA	CA	2016-08-16		0.8	80	1	16.42	7.62	114	0.043	0.1	7.86	82.9	0.028
ALEGRIA	CA	2016-08-16		0.9	90	2	16.39	7.61	113	0.043	0	7.7	81.1	0.028
ALEGRIA	CA	2016-08-16		0.1	10	3	16.37	7.6	114	0.043	0	7.57	79.8	0.028
ALEGRIA	CA	2016-08-16		0.11	11	4	16.33	7.6	114	0.043	0	7.5	79	0.028
ALEGRIA	CA	2016-08-16		0.12	12	5	16.3	7.6	114	0.043	0	7.39	77.8	0.028
ALEGRIA	CA	2016-08-16		0.13	13	6	16.3	7.59	113	0.043	0	7.31	76.9	0.028
ALEGRIA	CA	2016-08-16		0.14	14	7	16.3	7.59	113	0.043	0	7.24	76.2	0.028
ALEGRIA	CA	2016-08-16		0.15	15	8	16.3	7.59	113	0.043	0	7.18	75.6	0.028
ALEGRIA	CA	2016-08-16		0.16	16	9	16.31	7.58	113	0.043	0	7.12	74.9	0.028
ALEGRIA	CA	2016-08-16		0.17	17	10	16.29	7.58	113	0.043	0	7.11	74.8	0.028
ALEGRIA	CA	2016-09-20		0.1	10	1	19.99	7.97	218	0.062	0	6.92	78.3	0.041
ALEGRIA	CA	2016-09-20		0.2	20	2	19.98	7.96	219	0.062	0	6.92	78.2	0.041
ALEGRIA	CA	2016-09-20		0.3	30	3	20	7.93	219	0.062	0	6.91	78.1	0.041
ALEGRIA	CA	2016-09-20		0.4	40	4	19.98	7.92	220	0.062	0	6.9	78	0.041
ALEGRIA	CA	2016-09-20		0.5	50	5	19.97	7.91	220	0.063	0	6.93	78.3	0.041
ALEGRIA	CA	2016-09-20		0.6	60	6	19.98	7.89	221	0.063	0	6.86	77.5	0.041
ALEGRIA	CA	2016-09-20		0.7	70	7	19.97	7.87	222	0.063	0	6.78	76.7	0.041
ALEGRIA	CA	2016-09-20		0.8	80	8	19.98	7.87	222	0.063	0	6.73	76	0.041
ALEGRIA	CA	2016-09-20		0.9	90	9	19.97	7.86	222	0.063	0	6.7	75.8	0.041
ALEGRIA	CA	2016-09-20		0.1	10	10	19.97	7.84	223	0.063	0	6.73	76	0.041
ALEGRIA	CA	2016-10-18		3.7	370	1	19.32	7.57	242	0.024	1.6	6.12	68.4	0.016
ALEGRIA	CA	2016-10-18		3.8	380	2	19.29	7.55	243	0.024	1.3	6.14	68.5	0.016
ALEGRIA	CA	2016-10-18		3.9	390	3	19.28	7.53	243	0.024	1.4	6.16	68.7	0.016
ALEGRIA	CA	2016-10-18		3.1	310	4	19.3	7.51	244	0.024	1.8	6.23	69.5	0.016
ALEGRIA	CA	2016-10-18		3.11	311	5	19.29	7.49	244	0.025	1.4	6.11	68.2	0.016
ALEGRIA	CA	2016-10-18		3.12	312	6	19.28	7.47	245	0.024	1.4	5.97	66.6	0.016
ALEGRIA	CA	2016-10-18		3.13	313	7	19.26	7.44	246	0.024	1	5.8	64.7	0.016
ALEGRIA	CA	2016-10-18		3.14	314	8	19.26	7.42	246	0.024	1.2	5.68	63.3	0.016
ALEGRIA	CA	2016-10-18		3.15	315	9	19.23	7.4	247	0.024	3.8	5.79	64.5	0.016
ALEGRIA	CA	2016-10-18		3.16	316	10	19.23	7.38	248	0.024	6.4	6.01	67	0.016
ALEGRIA	CA	2016-11-15		1.9	190	1	20.06	8.03	216	0.062	0	7.19	81.4	0.041
ALEGRIA	CA	2016-11-15		1.1	110	2	20.02	8	217	0.063	0	7.12	80.5	0.041
ALEGRIA	CA	2016-11-15		1.11	111	3	20.01	7.98	218	0.063	0	7.03	79.5	0.041
ALEGRIA	CA	2016-11-15		1.12	112	4	19.97	7.84	222	0.063	0	6.74	76.2	0.041
ALEGRIA	CA	2016-11-15		1.13	113	5	19.96	7.83	223	0.063	0	6.71	75.8	0.041
ALEGRIA	CA	2016-11-15		1.14	114	6	19.94	7.82	223	0.063	0	6.65	75.2	0.041
ALEGRIA	CA	2016-11-15		1.15	115	7	19.95	7.8	224	0.063	0	6.64	75.1	0.041
ALEGRIA	CA	2016-11-15		1.16	116	8	19.96	7.79	224	0.063	0	6.66	75.2	0.041
ALEGRIA	CA	2016-11-15		1.17	117	9	19.52	7.86	232	0.051	0	6.42	71.9	0.033
ALEGRIA	CA	2016-11-15		1.18	118	10	19.52	7.81	229	0.051	0	6.4	71.8	0.033
ALEGRIA	CA	2016-12-20		2.3	230	1	20.41	7.33	220	0.069	0.4	8.13	92.6	0.045
ALEGRIA	CA	2016-12-20		2.4	240	2	20.42	7.39	218	0.069	0.4	8.13	92.7	0.045
ALEGRIA	CA	2016-12-20		2.5	250	3	20.42	7.44	218	0.069	0.5	8.08	92.1	0.045
ALEGRIA	CA	2016-12-20		2.6	260	4	20.43	7.48	217	0.069	0.5	8.05	91.7	0.045
ALEGRIA	CA	2016-12-20		2.7	270	5	20.43	7.51	217	0.069	0.6	8.06	91.9	0.045
ALEGRIA	CA	2016-12-20		2.8	280	6	20.43	7.54	216	0.069	0.6	8.04	91.7	0.045
ALEGRIA	CA	2016-12-20		2.9	290	7	20.43	7.57	216	0.069	0.5	8.05	91.7	0.045
ALEGRIA	CA	2016-12-20		2.1	210	8	20.43	7.59	216	0.069	0.5	7.97	90.9	0.045
ALEGRIA	CA	2016-12-20		2.11	211	9	20.42	7.61	216	0.069	0.5	7.97	90.9	0.045
ALEGRIA	CA	2016-12-20		2.12	212	10	20.42	7.63	216	0.069	0.5	8.01	91.3	0.045
ALEGRIA	CA	2017-01-17		10.9	1090	1	20.26	8.17	185	0.057	415	8.52	96.8	0.037
ALEGRIA	CA	2017-01-17		10.1	1010	2	20.26	8.16	185	0.057	414	8.29	94.2	0.037
ALEGRIA	CA	2017-01-17		10.11	1011	3	20.27	8.16	186	0.057	421	8.04	91.4	0.037
ALEGRIA	CA	2017-01-17		10.12	1012	4	20.27	8.15	186	0.057	429	8.07	91.7	0.037
ALEGRIA	CA	2017-01-17		10.13	1013	5	20.27	8.14	186	0.057	429	7.99	90.8	0.037
ALEGRIA	CA	2017-01-17		10.14	1014	6	20.27	8.14	187	0.057	428	7.82	88.9	0.037
ALEGRIA	CA	2017-01-17		10.15	1015	7	20.27	8.13	187	0.057	426	7.75	88.1	0.037
ALEGRIA	CA	2017-01-17		10.16	1016	8	20.27	8.12	188	0.057	425	7.74	87.9	0.037
ALEGRIA	CA	2017-01-17		10.17	1017	9	20.27	8.11	188	0.057	423	7.74	87.9	0.037
ALEGRIA	CA	2017-01-17		10.18	1018	10	20.26	8.11	188	0.057	423	7.66	87.1	0.037
UBERABA	RU	2016-01-19		2	200	1	23.59	5.28	303	0.005	4.6	6.55	78.9	0.003
UBERABA	RU	2016-01-19		2.1	210	2	23.59	5.43	295	0.005	4.2	6.56	79	0.003
UBERABA	RU	2016-01-19		2.2	220	3	23.59	5.45	294	0.005	3.9	6.48	78.1	0.003
UBERABA	RU	2016-01-19		2.3	230	4	23.59	5.16	312	0.005	4	6.4	77.1	0.003
UBERABA	RU	2016-01-19		2.4	240	5	23.59	5.05	317	0.005	4	6.42	77.3	0.003
UBERABA	RU	2016-01-19		2.5	250	6	23.59	5.4	296	0.005	4	6.46	77.7	0.003
UBERABA	RU	2016-01-19		2.6	260	7	23.59	5.4	298	0.005	4.1	6.42	77.3	0.003
UBERABA	RU	2016-01-19		2.7	270	8	23.6	5.46	294	0.005	4	6.47	77.9	0.003
UBERABA	RU	2016-01-19		2.8	280	9	23.6	5.51	291	0.005	4.1	6.41	77.2	0.003
UBERABA	RU	2016-01-19		2.9	290	10	23.59	5.51	292	0.005	4.2	6.39	77	0.003
UBERABA	RU	2016-02-16		5.9	590	1	24.6	5.31	265	0.007	1.1	6.9	84.5	0.004
UBERABA	RU	2016-02-16		5.1	510	2	24.7	5.27	267	0.006	1.1	6.43	78.9	0.004
UBERABA	RU	2016-02-16		5.11	511	3	24.78	5.27	268	0.007	1.2	6	73.7	0.004
UBERABA	RU	2016-02-16		5.12	512	4	24.56	5.19	272	0.006	1.3	5.93	72.5	0.004
UBERABA	RU	2016-02-16		5.13	513	5	24.38	5.11	276	0.006	1.1	6.33	77.2	0.004
UBERABA	RU	2016-02-16		5.14	514	6	24.4	5.12	276	0.006	1	6.06	73.9	0.004
UBERABA	RU	2016-02-16		5.15	515	7	24.35	5.06	280	0.006	1	5.89	71.8	0.004
UBERABA	RU	2016-02-16		5.16	516	8	24.27	4.93	287	0.005	1.1	6.08	74.1	0.003
UBERABA	RU	2016-02-16		5.17	517	9	24.29	4.97	285	0.005	1.1	6.09	74.2	0.003
UBERABA	RU	2016-02-16		5.18	518	10	24.27	5.04	282	0.005	1.1	5.93	72.2	0.003
UBERABA	RU	2016-03-15		4	400	1	23.84	5.31	283	0.005	3.3	9.48	114.7	0.004
UBERABA	RU	2016-03-15		4.1	410	2	23.79	5.19	288	0.005	3.2	8.95	108.2	0.003
UBERABA	RU	2016-03-15		4.2	420	3	23.75	5.16	288	0.005	3.3	8.46	102.1	0.003
UBERABA	RU	2016-03-15		4.3	430	4	23.74	5.16	288	0.005	3.2	8.07	97.5	0.003
UBERABA	RU	2016-03-15		4.4	440	5	23.73	5.22	286	0.005	3.4	7.8	94.1	0.003
UBERABA	RU	2016-03-15		4.5	450	6	23.72	5.15	289	0.005	3.3	7.58	91.4	0.003
UBERABA	RU	2016-03-15		4.6	460	7	23.71	5.2	287	0.005	3.1	7.4	89.3	0.003
UBERABA	RU	2016-03-15		4.7	470	8	23.71	5.23	287	0.005	3.2	7.25	87.5	0.003
UBERABA	RU	2016-03-15		4.8	480	9	23.71	5.26	285	0.005	3.2	7.13	86	0.003
UBERABA	RU	2016-03-15		4.9	490	10	23.7	5.25	286	0.005	3.4	7.03	84.8	0.003
UBERABA	RU	2016-04-19		2.4	240	1	23.53	5.33	264	0.005	1.9	7.19	86.4	0.003
UBERABA	RU	2016-04-19		2.5	250	2	23.52	5.33	265	0.005	1.8	7.22	86.9	0.003
UBERABA	RU	2016-04-19		2.6	260	3	23.52	5.33	265	0.005	1.8	7.16	86.1	0.003
UBERABA	RU	2016-04-19		2.7	270	4	23.51	5.35	265	0.005	2.1	7.03	84.5	0.003
UBERABA	RU	2016-04-19		2.8	280	5	23.51	5.33	267	0.005	2.4	6.92	83.2	0.003
UBERABA	RU	2016-04-19		2.9	290	6	23.51	5.35	267	0.005	2	6.92	83.2	0.003
UBERABA	RU	2016-04-19		2.1	210	7	23.51	5.35	268	0.005	2.1	6.87	82.6	0.003
UBERABA	RU	2016-04-19		2.11	211	8	23.5	5.35	269	0.005	1.9	6.8	81.8	0.003
UBERABA	RU	2016-04-19		2.12	212	9	23.51	5.31	272	0.005	1.8	6.83	82.2	0.003
UBERABA	RU	2016-04-19		2.13	213	10	23.52	5.23	277	0.005	1.8	6.92	83.3	0.003
UBERABA	RU	2016-05-17		0.5	50	1	20.09	5.79	247	0.004	0.8	7.82	88.6	0.002
UBERABA	RU	2016-05-17		0.6	60	2	20.09	5.76	249	0.004	1.1	7.86	89	0.002
UBERABA	RU	2016-05-17		0.7	70	3	20.09	5.73	250	0.004	1	7.8	88.3	0.002
UBERABA	RU	2016-05-17		0.8	80	4	20.09	5.72	250	0.004	1	7.81	88.4	0.002
UBERABA	RU	2016-05-17		0.9	90	5	20.09	5.71	251	0.004	1.1	7.79	88.2	0.002
UBERABA	RU	2016-05-17		0.1	10	6	20.09	5.7	251	0.004	0.8	7.74	87.7	0.002
UBERABA	RU	2016-05-17		0.11	11	7	20.09	5.68	252	0.004	1	7.82	88.6	0.002
UBERABA	RU	2016-05-17		0.12	12	8	20.09	5.67	252	0.004	1	7.8	88.3	0.002
UBERABA	RU	2016-05-17		0.13	13	9	20.1	5.66	253	0.004	1.2	7.75	87.8	0.002
UBERABA	RU	2016-05-17		0.14	14	10	20.09	5.65	254	0.004	1.2	7.72	87.4	0.002
UBERABA	RU	2016-06-21		0.2	20	1	16.69	5.09	285	0.003	1.1	6.71	71.2	0.002
UBERABA	RU	2016-06-21		0.3	30	2	16.68	4.99	289	0.003	0.9	6.58	69.8	0.002
UBERABA	RU	2016-06-21		0.4	40	3	16.68	4.96	289	0.003	1	6.57	69.6	0.002
UBERABA	RU	2016-06-21		0.5	50	4	16.68	4.96	288	0.003	0.9	6.57	69.6	0.002
UBERABA	RU	2016-06-21		0.6	60	5	16.68	4.94	289	0.003	1	6.52	69.2	0.002
UBERABA	RU	2016-06-21		0.7	70	6	16.68	4.94	288	0.003	1	6.49	68.8	0.002
UBERABA	RU	2016-06-21		0.8	80	7	16.67	4.96	287	0.003	1.1	6.48	68.7	0.002
UBERABA	RU	2016-06-21		0.9	90	8	16.67	4.94	287	0.003	1.4	6.49	68.8	0.002
UBERABA	RU	2016-06-21		0.1	10	9	16.68	4.93	288	0.003	0.9	6.43	68.2	0.002
UBERABA	RU	2016-06-21		0.11	11	10	16.67	4.93	288	0.003	1	6.4	67.8	0.002
UBERABA	RU	2016-07-19		0	0	1	18.01	7.31	132	0.13	3.9	5.74	62.5	0.085
UBERABA	RU	2016-07-19		0.1	10	2	17.96	7.33	131	0.13	3.6	5.68	61.8	0.085
UBERABA	RU	2016-07-19		0.2	20	3	17.95	7.34	130	0.13	3.4	5.44	59.2	0.085
UBERABA	RU	2016-07-19		0.3	30	4	17.95	7.35	128	0.13	3.4	5.18	56.4	0.085
UBERABA	RU	2016-07-19		0.4	40	5	17.95	7.36	127	0.13	3.5	5.18	56.4	0.085
UBERABA	RU	2016-07-19		0.5	50	6	17.96	7.36	126	0.13	3.7	5.07	55.2	0.085
UBERABA	RU	2016-07-19		0.6	60	7	17.97	7.37	126	0.13	3.7	4.8	52.3	0.085
UBERABA	RU	2016-07-19		0.7	70	8	17.98	7.38	125	0.13	3.6	4.65	50.6	0.085
UBERABA	RU	2016-07-19		0.8	80	9	17.97	7.38	123	0.13	3.7	4.61	50.2	0.085
UBERABA	RU	2016-07-19		0.9	90	10	17.97	7.39	122	0.13	3.7	4.6	50.1	0.085
UBERABA	RU	2016-08-16		0.8	80	1	18.44	6.54	239	0.004	0	6.64	72.9	0.003
UBERABA	RU	2016-08-16		0.9	90	2	18.41	6.36	244	0.004	0	6.65	73	0.003
UBERABA	RU	2016-08-16		0.1	10	3	18.39	6.23	247	0.004	1.4	6.56	71.9	0.003
UBERABA	RU	2016-08-16		0.11	11	4	18.39	6.12	248	0.004	0.5	6.42	70.4	0.003
UBERABA	RU	2016-08-16		0.12	12	5	18.37	6.1	246	0.004	0	6.25	68.5	0.003
UBERABA	RU	2016-08-16		0.13	13	6	18.36	6.02	247	0.004	0.2	6.24	68.4	0.003
UBERABA	RU	2016-08-16		0.14	14	7	18.36	5.99	247	0.004	0	6.22	68.2	0.003
UBERABA	RU	2016-08-16		0.15	15	8	18.35	5.91	248	0.004	0	6.21	68.1	0.003
UBERABA	RU	2016-08-16		0.16	16	9	18.36	5.9	248	0.004	0.1	6.22	68.2	0.003
UBERABA	RU	2016-08-16		0.17	17	10	18.35	5.91	247	0.004	0.1	6.22	68.2	0.003
UBERABA	RU	2016-09-20		0.1	10	1	23.36	6.12	295	0.136	4.9	7.83	94	0.088
UBERABA	RU	2016-09-20		0.2	20	2	23.38	6.16	296	0.136	4.4	7.52	90.2	0.089
UBERABA	RU	2016-09-20		0.3	30	3	23.39	6.18	296	0.136	4.3	7.25	87	0.089
UBERABA	RU	2016-09-20		0.4	40	4	23.39	6.18	297	0.136	4.6	7.04	84.6	0.089
UBERABA	RU	2016-09-20		0.5	50	5	23.39	6.18	297	0.137	3.9	6.88	82.6	0.089
UBERABA	RU	2016-09-20		0.6	60	6	23.38	6.17	298	0.137	3.5	6.76	81.2	0.089
UBERABA	RU	2016-09-20		0.7	70	7	23.37	6.16	298	0.137	3.5	6.64	79.7	0.089
UBERABA	RU	2016-09-20		0.8	80	8	23.36	6.15	299	0.137	3.3	6.55	78.6	0.089
UBERABA	RU	2016-09-20		0.9	90	9	19.1	6.91	170	0.091	1.4	7.6	84.5	0.059
UBERABA	RU	2016-09-20		0.1	10	10	19.11	6.89	170	0.091	1.3	7.55	84	0.059
UBERABA	RU	2016-10-18		3.7	370	1	20.56	6.87	14	0.069	37.1	6.86	78.3	0.045
UBERABA	RU	2016-10-18		3.8	380	2	20.57	6.84	15	0.069	43.9	6.88	78.6	0.045
UBERABA	RU	2016-10-18		3.9	390	3	20.57	6.8	16	0.069	42.6	6.84	78.2	0.045
UBERABA	RU	2016-10-18		3.1	310	4	20.57	6.78	17	0.069	43.9	6.77	77.4	0.045
UBERABA	RU	2016-10-18		3.11	311	5	20.58	6.77	17	0.069	41.3	6.68	76.3	0.045
UBERABA	RU	2016-10-18		3.12	312	6	20.58	6.75	17	0.07	30.7	6.58	75.2	0.045
UBERABA	RU	2016-10-18		3.13	313	7	20.58	6.74	17	0.071	27.3	6.47	73.9	0.046
UBERABA	RU	2016-10-18		3.14	314	8	20.57	6.73	17	0.072	28	6.29	71.9	0.047
UBERABA	RU	2016-10-18		3.15	315	9	20.58	6.73	17	0.073	30.2	6.07	69.4	0.047
UBERABA	RU	2016-10-18		3.16	316	10	20.58	6.72	17	0.073	31	6	68.6	0.047
UBERABA	RU	2016-11-15		1.9	190	1	21.4	7.71	119	0.089	0	6.34	73.5	0.058
UBERABA	RU	2016-11-15		1.1	110	2	21.4	7.71	120	0.089	0	6.33	73.4	0.058
UBERABA	RU	2016-11-15		1.11	111	3	21.4	7.71	121	0.089	0	6.31	73.2	0.058
UBERABA	RU	2016-11-15		1.12	112	4	21.4	7.7	121	0.089	0	6.28	72.8	0.058
UBERABA	RU	2016-11-15		1.13	113	5	21.39	7.7	122	0.089	0	6.26	72.7	0.058
UBERABA	RU	2016-11-15		1.14	114	6	21.39	7.69	123	0.089	0	6.24	72.3	0.058
UBERABA	RU	2016-11-15		1.15	115	7	21.39	7.69	123	0.089	0	6.22	72.1	0.058
UBERABA	RU	2016-11-15		1.16	116	8	21.38	7.68	124	0.089	0	6.21	72	0.058
UBERABA	RU	2016-11-15		1.17	117	9	21.38	7.68	124	0.089	0	6.17	71.6	0.058
UBERABA	RU	2016-11-15		1.18	118	10	21.38	7.67	125	0.089	0	6.12	71	0.058
UBERABA	RU	2016-12-20		2.3	230	1	21.74	7.57	108	0.089	0.3	10	116.7	0.058
UBERABA	RU	2016-12-20		2.4	240	2	21.73	7.6	109	0.089	0	8.66	101.1	0.058
UBERABA	RU	2016-12-20		2.5	250	3	21.69	7.62	109	0.089	0	7.99	93.2	0.058
UBERABA	RU	2016-12-20		2.6	260	4	21.64	7.65	109	0.089	0	7.6	88.6	0.058
UBERABA	RU	2016-12-20		2.7	270	5	21.6	7.67	109	0.089	0	7.35	85.5	0.058
UBERABA	RU	2016-12-20		2.8	280	6	21.57	7.69	110	0.089	0	7.17	83.5	0.058
UBERABA	RU	2016-12-20		2.9	290	7	21.55	7.7	110	0.089	0	7.02	81.7	0.058
UBERABA	RU	2016-12-20		2.1	210	8	21.52	7.71	110	0.089	0	6.9	80.2	0.058
UBERABA	RU	2016-12-20		2.11	211	9	21.5	7.72	111	0.089	0	6.83	79.3	0.058
UBERABA	RU	2016-12-20		2.12	212	10	21.5	7.72	111	0.089	0	6.74	78.4	0.058
UBERABA	RU	2017-01-17		10.9	1090	1	20.3	7.77	220	0.009	0.6	10.69	121.5	0.006
UBERABA	RU	2017-01-17		10.1	1010	2	20.3	7.61	225	0.009	0.6	10.49	119.3	0.006
UBERABA	RU	2017-01-17		10.11	1011	3	20.29	7.45	231	0.008	0.6	10.31	117.3	0.005
UBERABA	RU	2017-01-17		10.12	1012	4	20.28	7.29	237	0.008	0.7	10.16	115.4	0.005
UBERABA	RU	2017-01-17		10.13	1013	5	20.28	7.14	242	0.008	0.8	10.04	114.1	0.005
UBERABA	RU	2017-01-17		10.14	1014	6	20.27	7	245	0.008	0.6	9.94	112.9	0.005
UBERABA	RU	2017-01-17		10.15	1015	7	20.27	6.89	248	0.007	0.6	9.85	111.9	0.005
UBERABA	RU	2017-01-17		10.16	1016	8	20.27	6.79	251	0.007	0.6	9.77	111	0.005
UBERABA	RU	2017-01-17		10.17	1017	9	20.27	6.7	253	0.007	0.5	9.7	110.2	0.005
UBERABA	RU	2017-01-17		10.18	1018	10	20.26	6.61	255	0.007	0.6	9.64	109.5	0.005
